# Supplementary material
Source: bioRxiv or medRxiv preprint supplement (https://www.biorxiv.org/highwire/filestream/78068/field_highwire_adjunct_files/0/176040-1.pdf)
Supplement: Supplementary file [file 176040-1.pdf]

# Supplementary Information

For

## **Environmental fluctuations accelerate molecular evolution of thermal tolerance in a marine diatom**

C.-Elisa Schaum, A. Buckling, N. Smirnoff, D. J. Studholme & G. Yvon-Durocher

Correspondence to [elisa.schaum@uni-hamburg.de](mailto:elisa.schaum@uni-hamburg.de) or [g.yvon-durocher@exeter.ac.uk](mailto:g.yvon-durocher@exeter.ac.uk)

### **This PDF file includes:**

#### **Figures S1 – S15:**

Fig S1: Experimental Design

Fig S2: Trajectories of population size over the experimental period

Fig S3: Light response curves for the photochemical efficiency of photosystem II.

Fig S4: Changes in macromolecular composition per cell

Fig S5: Carbon-use efficiency in the lineages evolved under fluctuating warming.

Fig S6: Neighbour joining tree single nucleotide variants (see main manuscript Fig. 4A)

Fig S7: Confidence intervals around single nucleotide estimates at t300

Fig S8: Neighbour joining tree phenotypic traits (see main manuscript Fig. 4B)

Fig S9: Copy number variation (CNV) in chromosome 8

Fig S10: CNV in chromosome 23

Fig S11: CNV in chromosome 19

Fig S12: Estimated allele frequencies for 14 single-nucleotide variants that introduce premature stop codons into *T. pseudonana* protein-coding genes

Fig S13: Estimated allele frequencies for single-nucleotide variants in seven *T. pseudonana* protein-coding genes that have recurrently undergone fixation of a non-silent single-nucleotide variant.

Fig S14: PCA of Bray-Curtis differences in bacterial composition across all treatments

Fig S15: Fitness trajectories for each replicate.

**Tables S1 – S17:**

Table S1: Summary of traits in ancestral and evolved populations.

Table S2: Model selection on generalized additive mixed effects model (GAMM) fitted to the trajectories of population growth.

Table S3: Model selection on generalized additive mixed effects model (GAMM) fitted to the trajectories of population size.

Table S4: Thermal tolerance curve parameters for the ancestor (growth rate).

Table S5: Model selection and parameters of thermal tolerance curves of the evolved lineages (growth rate).

Table S6: Model selection and parameters for the thermal responses of gross photosynthesis and respiration in the ancestor.

Table S7: Model selection and parameters for the thermal response of gross photosynthesis in the evolved lineages.

Table S8: Model selection and parameters for the thermal response of respiration in the evolved lineages.

Table S9: Model selection to determine the effects of selection regime on the carbon use efficiency.

Table S10: Model selection for cell size, C, N, P, Si, RNA and protein content per biovolume, C:N, C:P, N:P, Chl:C ratio, well as  $\Phi$ PSII at irradiance as in the incubator for the ancestor at assay temperatures spanning 15°C to 35°C

Table S11: Model selection for cell size, C, N, P, Si, RNA and protein content per biovolume, C:N, C:P, N:P, Chl:C ratio, well as  $\Phi$ PSII at irradiance as in the incubator for evolved samples assayed in their selection environment.

Table S12: PERMANOVA and pairwise comparison for differences between treatments (Phenotypes)

Table S13: Seven candidate genes that had recurrently undergone fixation of a non-silent single-nucleotide variant

Table S14: Aligned sequence depths for each sequenced population

Table S15: Model selection for the light response curves of photochemical efficiency (FRRF data).

Table S16: PERMANOVA and pairwise comparison for differences between treatments (Bacterial composition)

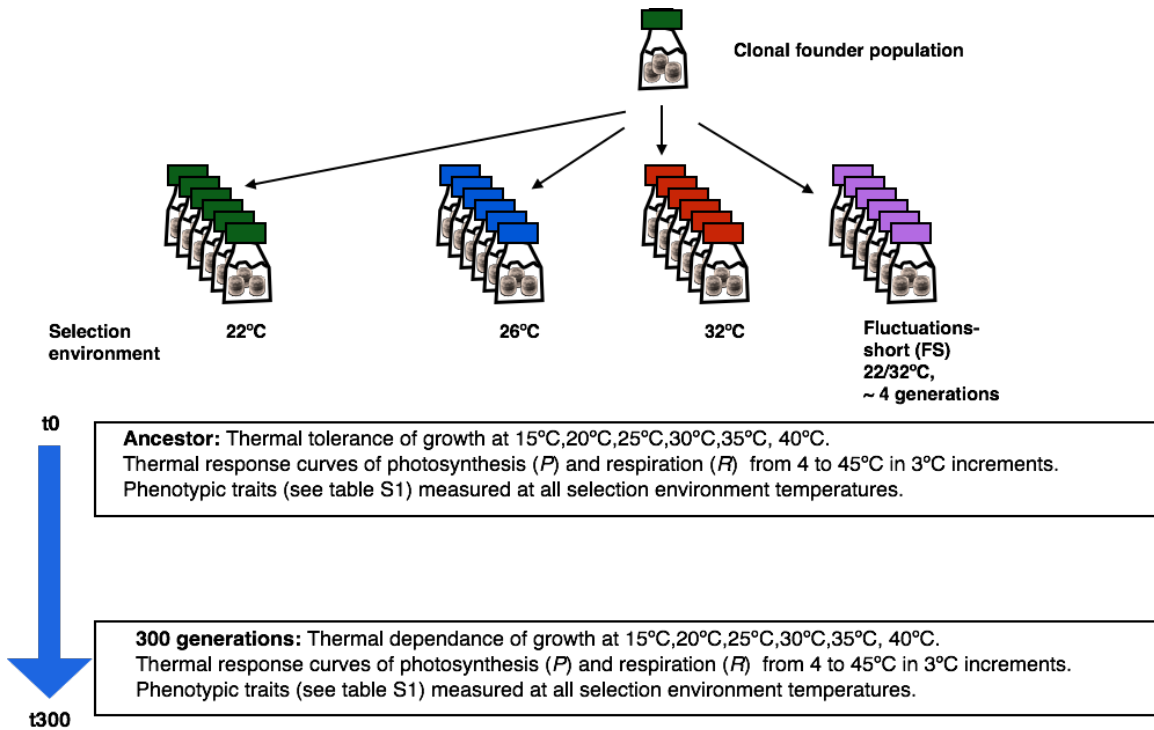

**Figure S1 | Experimental design.** Six biological replicates in four selection regimes (the control environment at 22°C, a moderate warming environment at 26°C, a severe environment at 32°C, and an environment that cycled between 22°C and 32°C approximately every 4 generations “fluctuating – short” or “FS”) were founded from a single clone, and then propagated through semi-continuous batch culture for at least 300 generations. The temperatures for moderate and extreme warming were chosen based on pilot data, which showed that 32°C was past the optimum temperature for growth, but did not induce excessive mortality, and that 26°C represented the predicted average increase in sea surface temperature according to the IPCC RCP4.5 scenario (+ 4°C from ambient). The fluctuating environment represents a conceptually more likely scenario where organisms’ experience only short periods of severe conditions followed by recovery of the benign environment. At the beginning of the experiment ( $t_0$ ), and at the end ( $t_{300}$ ), a wide range of metabolic and macromolecular traits were quantified in the ancestor and the evolved lineages (see methods).

**A**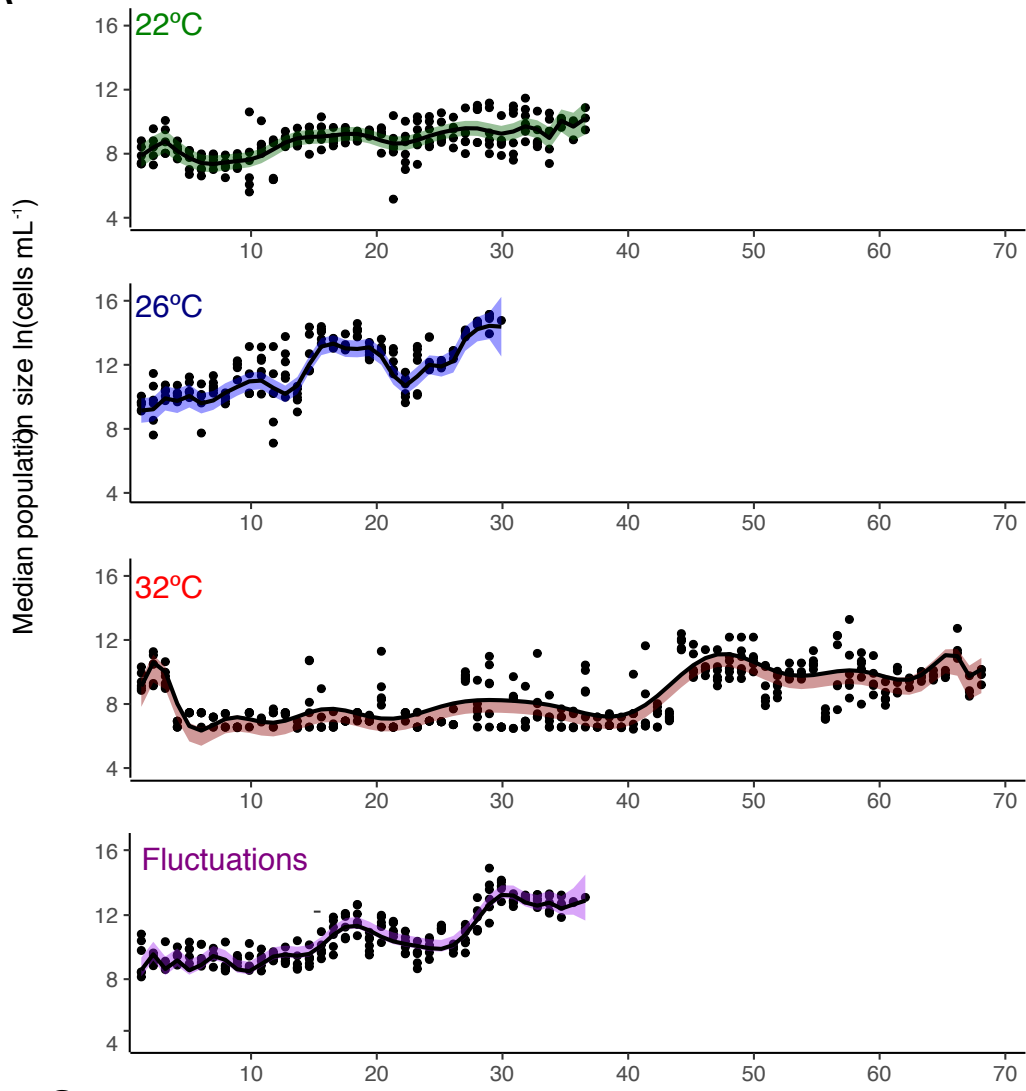**B**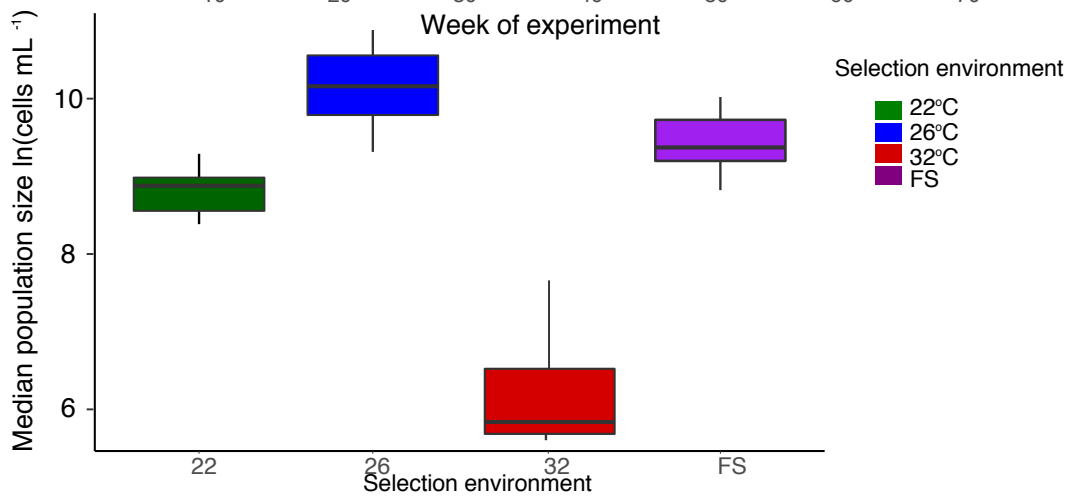

**Figure | S2 Trajectories of population size over the selection experiment. (A)**

Trajectories of population size (displayed as natural logarithm of cells  $\text{mL}^{-1}$ ) up to 300 generations determined from the cell density at the end of each transfer. Under moderate warming and in the fluctuating environment, there are rapid, sustained increases in population size. Under severe warming ( $32^{\circ}\text{C}$ ), population size remained low until evolutionary rescue occurred after approximately 1 year ( $\sim 100$  generation). Although all samples received the same size inoculum at each transfer, mutational supply would have been larger in samples that attained higher population densities during the exponential phase of growth. Fitted lines are from the best fits of a GAMM (Table S3). (B) Boxplots of replicate level estimates (fixed and random effects of GAMM ) for median population size for each environment calculated over 300 generations. Median population size (again displayed as natural logarithms of cells  $\text{mL}^{-1}$ ) was highest in samples evolving under moderate warming and in the fluctuating environment, while those at  $32^{\circ}\text{C}$  had the lowest average population size. Green samples are the control at  $22^{\circ}\text{C}$ , blue is  $26^{\circ}\text{C}$ , red is  $32^{\circ}\text{C}$ , and purple is the fluctuating environment.

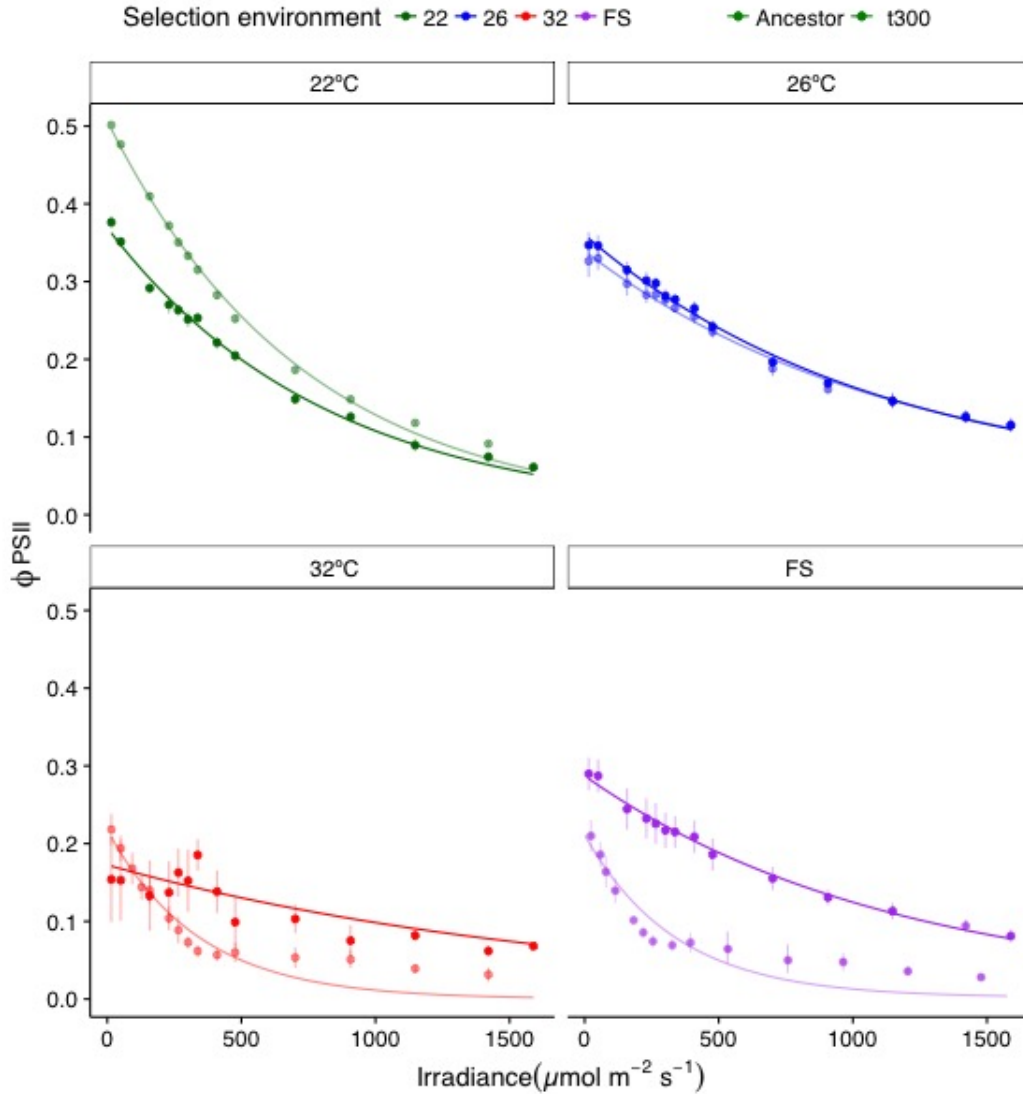

**Figure S3| Light response curves for the photochemical efficiency of photosystem II.**

The light response curves for photochemical efficiency,  $\Phi_{PSII}$ , differed both among selection environments and between the evolved lineages and the ancestor.  $\Phi_{PSII}$  was the highest and declined less steeply with increasing irradiance in the moderate (26°C) and fluctuating warming treatments. Lineages in the severe warming treatment (32°C) had very low photochemical efficiency. Green denotes populations evolved at 22°C, blue for samples evolved at 26°C, red for 32°C, and purple for the fluctuating environment, FS. The ancestor (faded colour) at each temperature is displayed alongside the evolved lineages. All values are means  $\pm$  1 s.e.m. The fitted curves are derived from the best fits of a non-linear mixed effects model on Eq. (8).

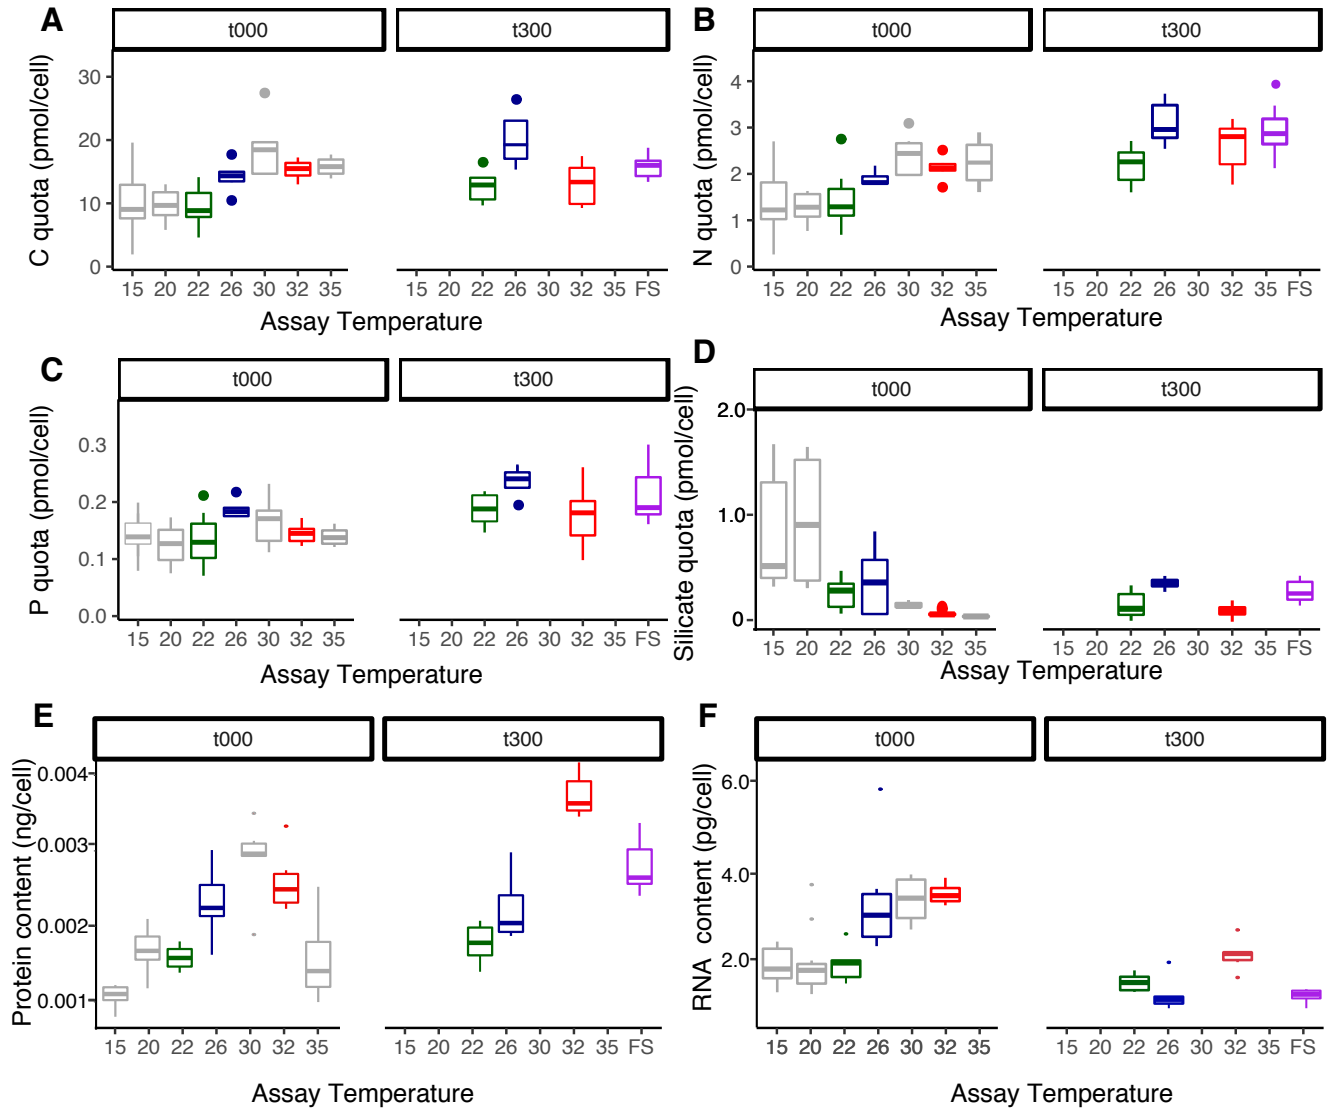

**Figure S4 | Changes in macromolecular composition per cell in ancestral and evolved samples.** We investigated short-term thermal acclimation by exposing the ancestor at t000 to a 15 to 35°C thermal gradient. The effects of long-term evolutionary adaptation to was quantified after 300 generations in the selection regimes. **(A-C)** For elemental composition (C, N, P) per cell (and hence the resulting stoichiometry, see main manuscript), the direction of acclimation was the same as that of the evolutionary response, **(D)** Intracellular silicate content decreased, on a per cell basis, with temperature in the short term, but samples at 26°C and FS re-established silicate contents similar to those of the ancestor and the control after 300 generations. **(E-F):** Protein and RNA content per cell increased with temperature both in the short-term and in the long-term. For all boxplots, n=6. Grey denotes ancestor assay temperatures that were not used as selection regimes. Green for selection and/or assay at 22°C, blue at 26°C, red at 32°C and purple for the fluctuating environment (FS).

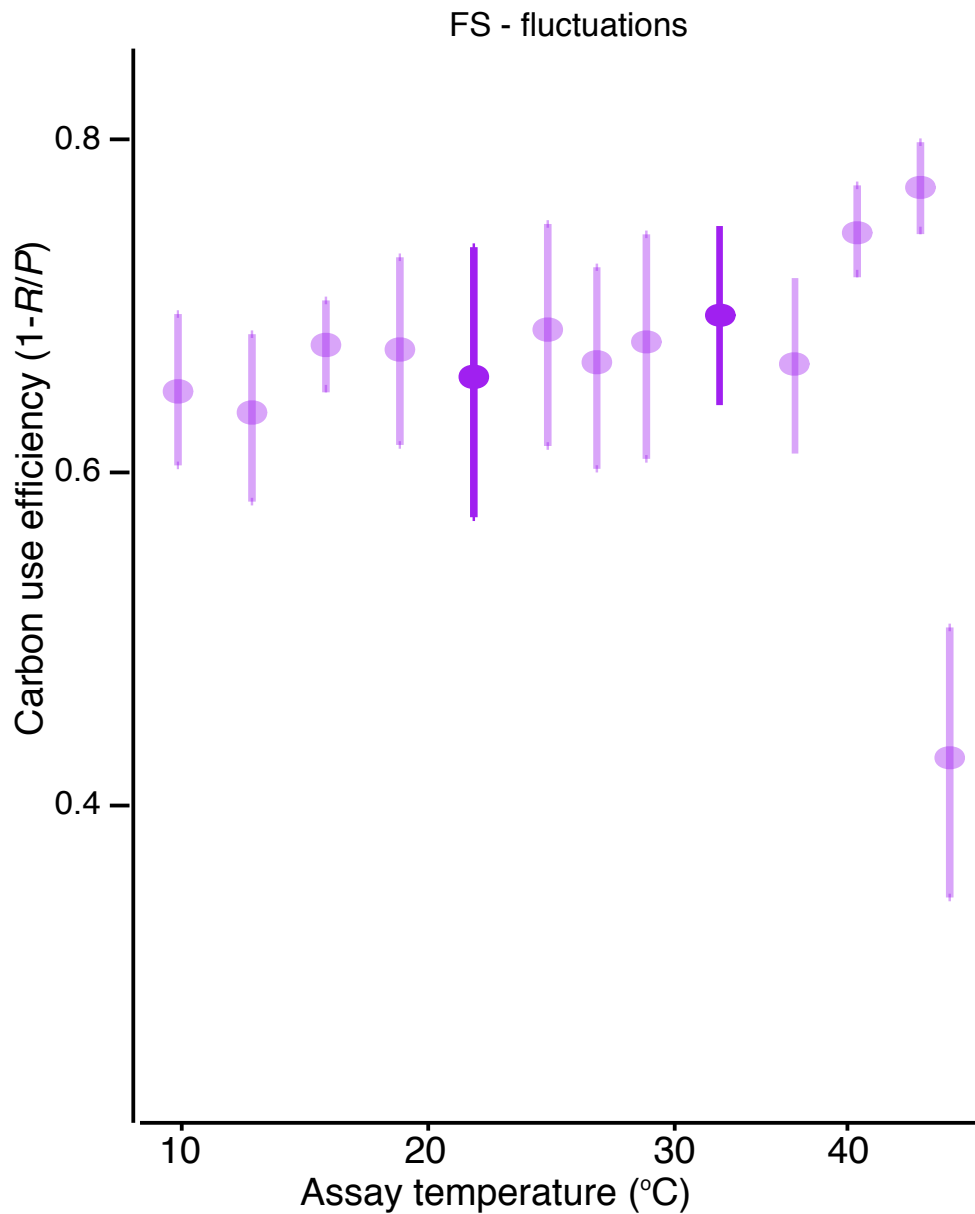

**Figure S5| Carbon-use efficiency in the lineages evolved under fluctuating warming.** Carbon-use efficiency (CUE) in the lineages evolved in the fluctuating environment (between 22 and 32°C) did not differ significantly between assay temperatures spanning 10°C to 35°C. In the main manuscript, we present CUE at 32°C for ease of comparison with the stable 32°C selection environment. 22°C and 32°C are in bold, all other assay temperatures are faded. Data are displayed as means  $\pm$  1 s.e.m.



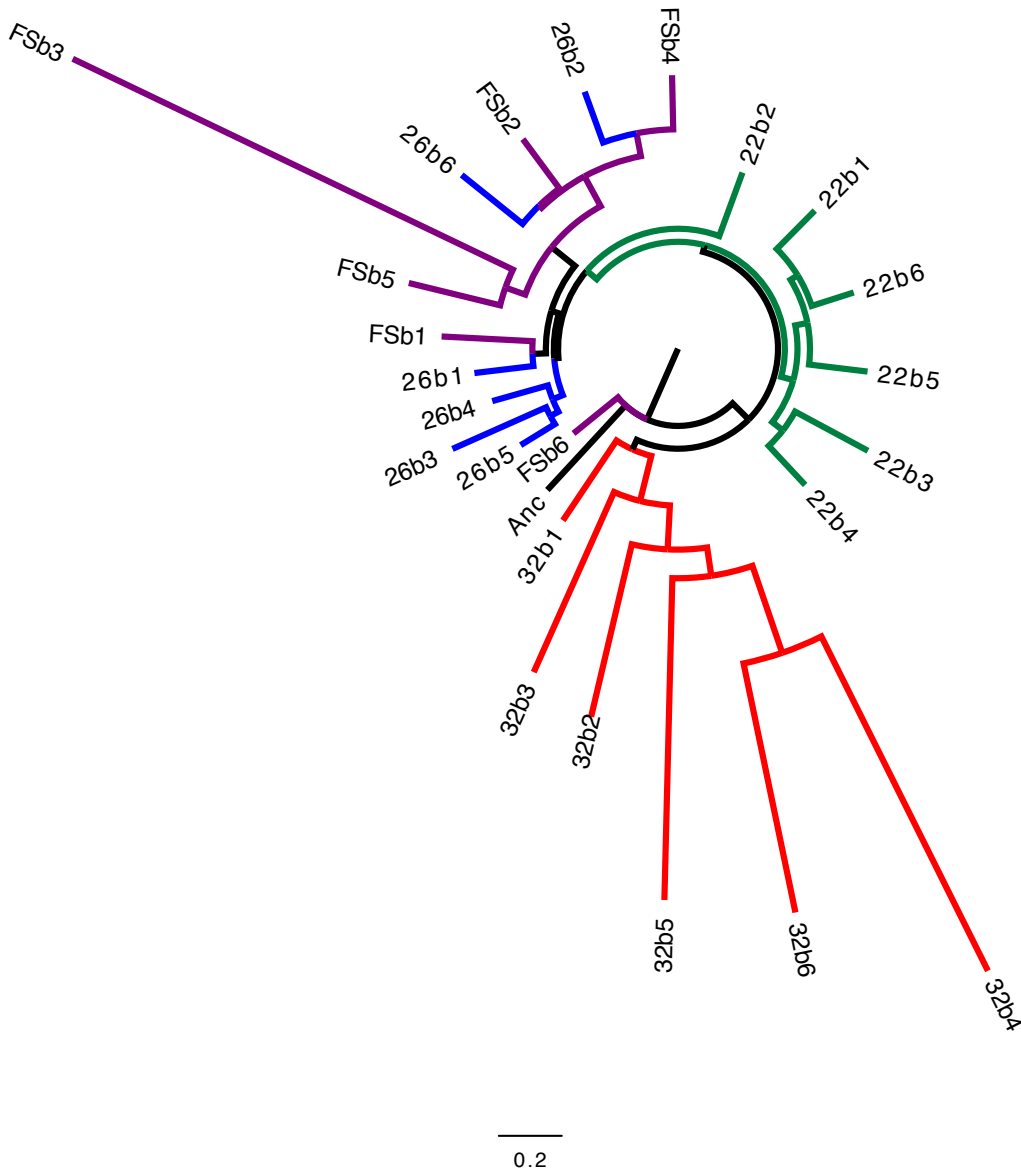

**Figure S6| Neighbour joining tree based on Euclidean distances for single nucleotide variants in protein-coding regions that had reached fixation after 300 generations of evolution in the respective selection environment.** The tree has been rooted at the node including the ancestral population and shows clustering of samples evolved at 22°C and 32°C with samples from the 26°C and fluctuating selection regime intertwined with each other. Evolved samples are colour coded based on selection regime with green denoting control (22°C), blue, moderate warming (26°C), red, severe warming (32°C), and purple, evolution in the fluctuating environment. The bar is indicative of the Euclidean distance.

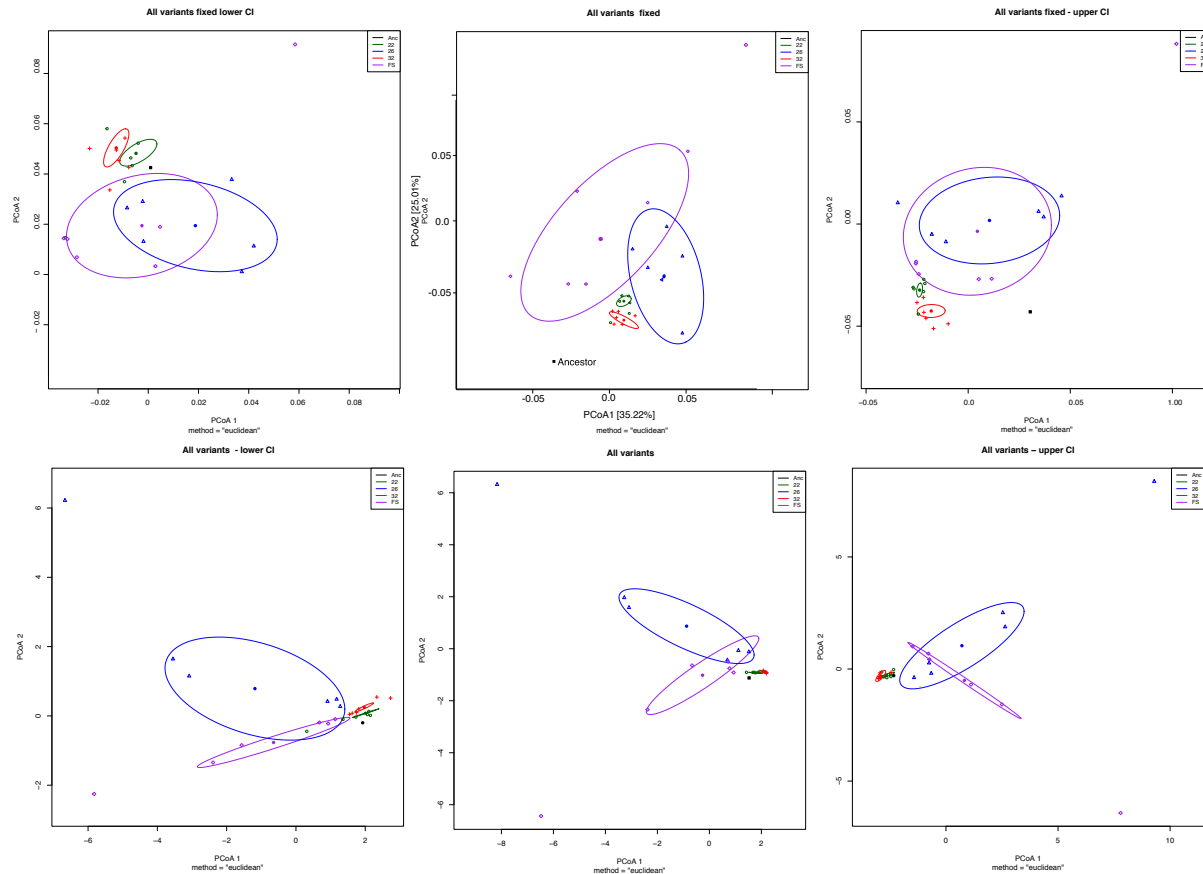

**Figure S7 | Single nucleotide variations in protein-coding regions that had reached fixation (upper row) and that had not yet reached fixation (lower row) after 300 generations of evolution in the respective selection environment.** Displayed are the lower (left) and upper (right) confidence intervals around the estimate (middle), as calculated following Clopper & Pearson 1934 (see methods, reference 55). PCAs were constructed using Euclidean distance, and the colours denote the selection regime, with the Ancestor in black, populations evolved at 22°C in green, blue for 26°C, red for 32°C, and purple for the fluctuating environment

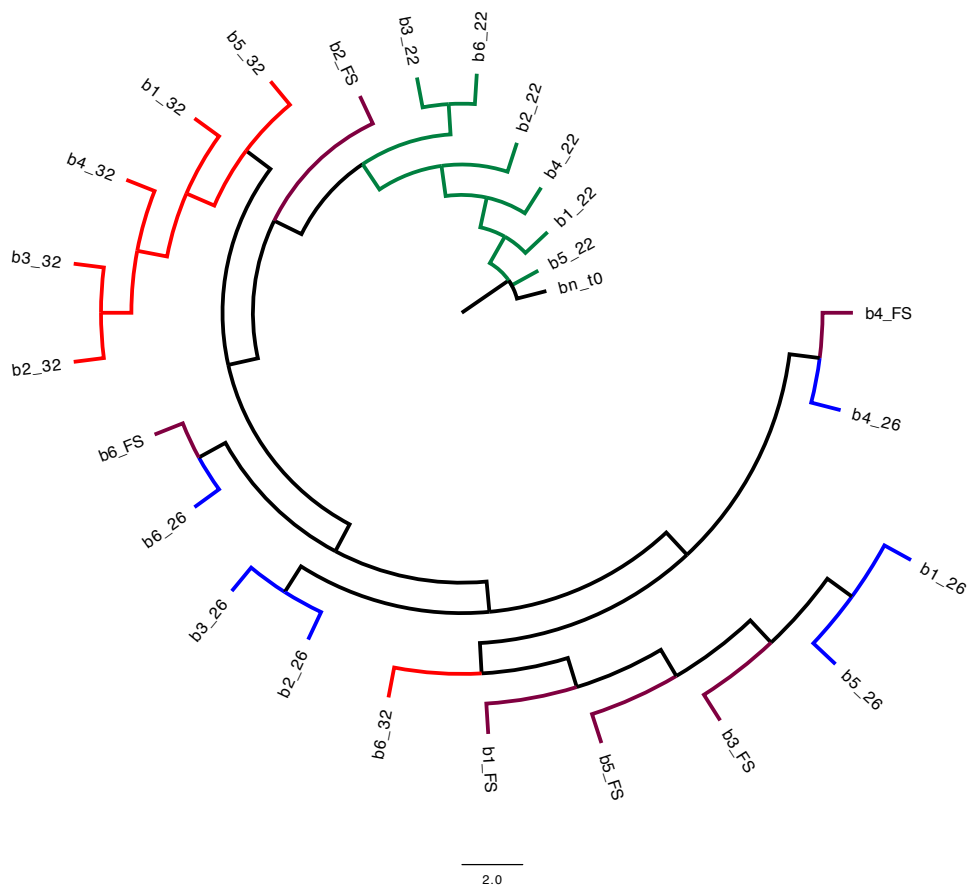

**Figure S8| Neighbour joining tree based on Euclidean distances calculated from phenotypic trait values in the ancestor and evolved samples.** Samples evolved at 22°C cluster with each other and are most similar to the ancestor, whereas samples from the 26°C and fluctuating selection regime intertwined with each other and show a greater distance to the ancestor. Evolved samples are colour coded based on selection regime with green denoting control (22°C), blue, moderate warming (26°C), red, severe warming (32°C), and purple, evolution in the fluctuating environment. The bar is indicative of the Euclidean distance.

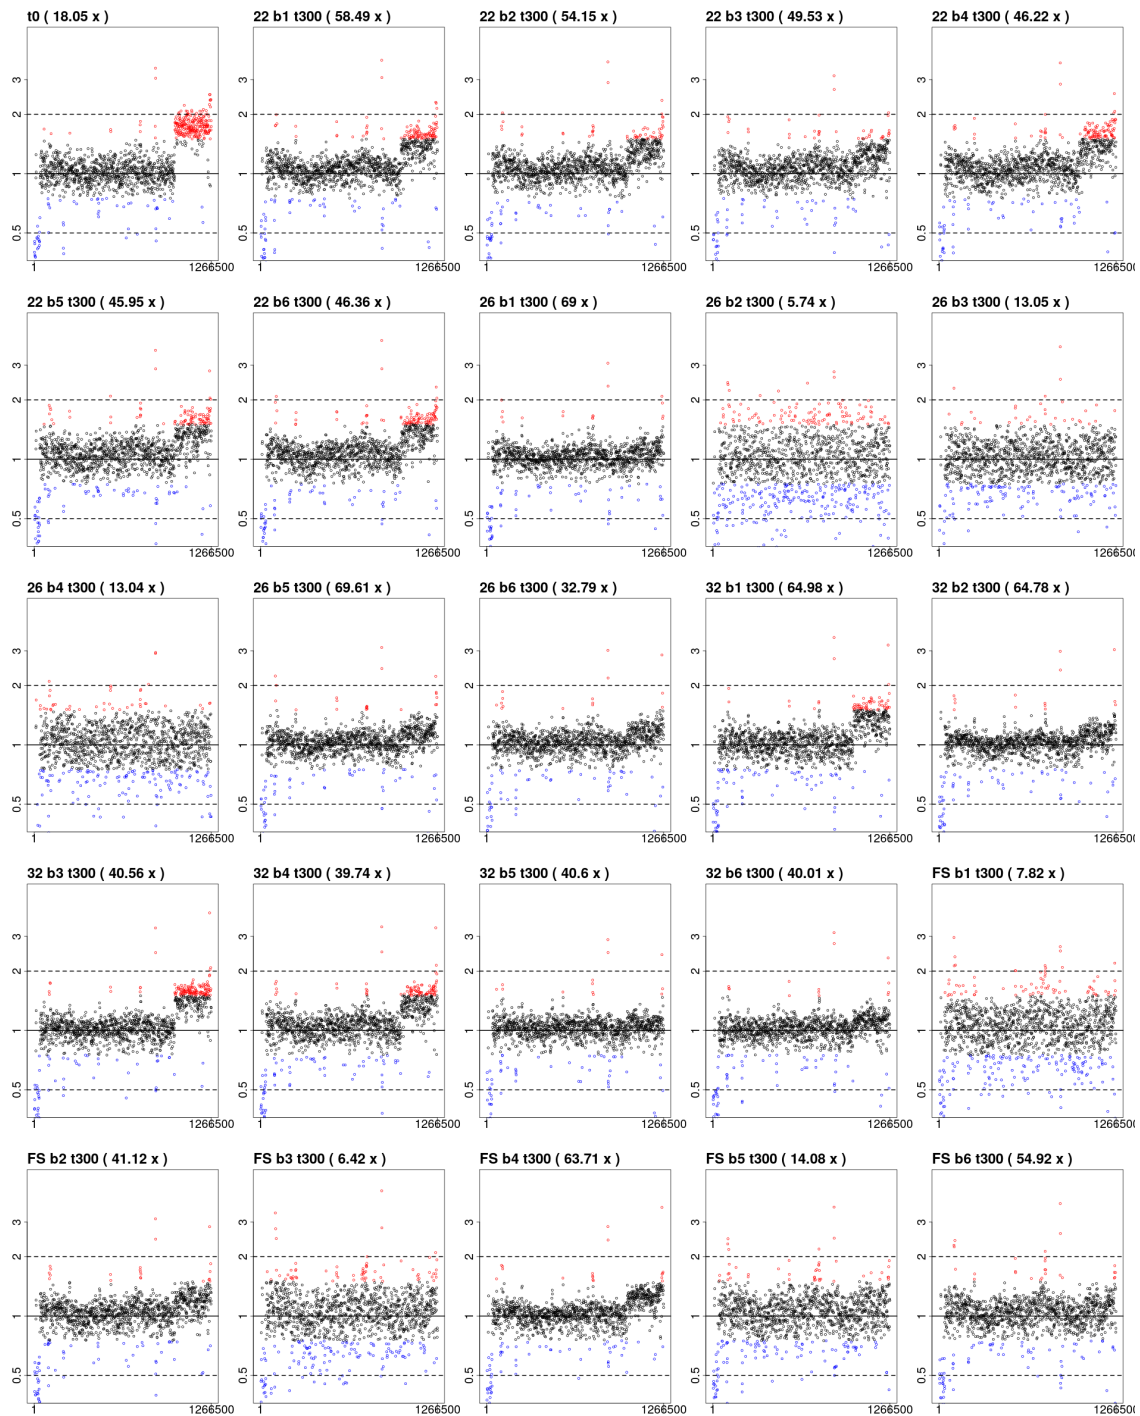

**Figure S9| Copy-number variation in chromosome 8 among populations.** The horizontal axis represents position on the chromosome. The vertical axis represents sequencing depth normalized against the sequencing depth for that population over the whole genome. To aid visual identification of differences in copy-number profile among populations, depths of greater than 1.5 x median are colored red and those less than 0.75 x median are colored blue.

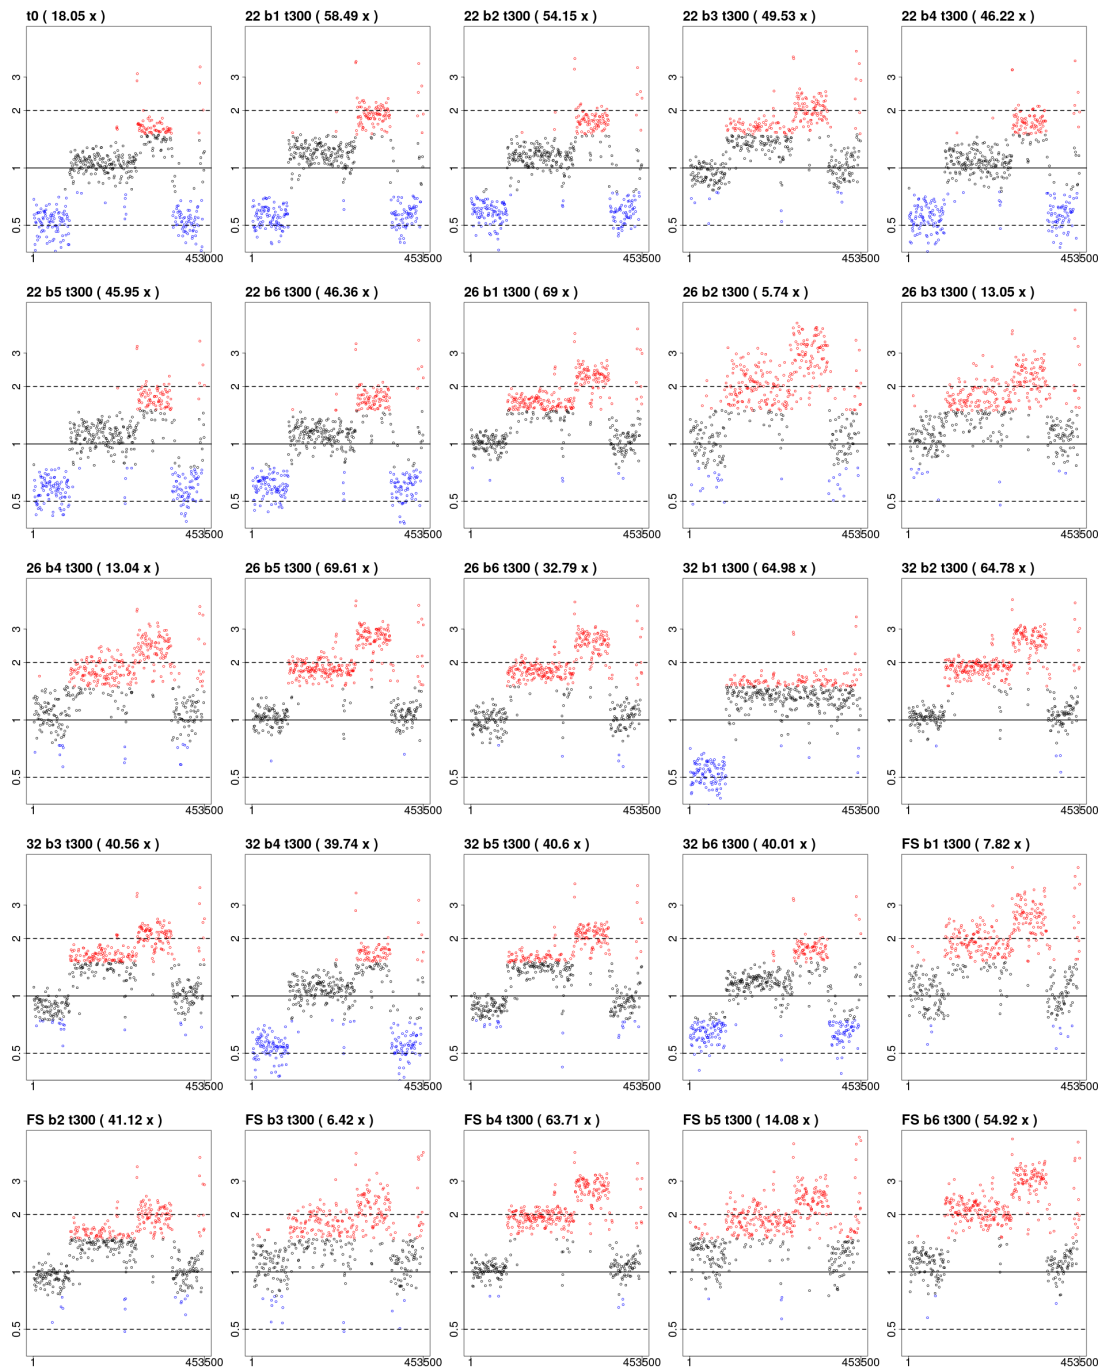

**Figure S10| Copy-number variation in chromosome 23 among populations.** The horizontal axis represents position on the chromosome. The vertical axis represents sequencing depth normalized against the sequencing depth for that population over the whole genome. To aid visual identification of differences in copy-number profile among populations, depths of greater than 1.5 x median are colored red and those less than 0.75 x median are colored blue.

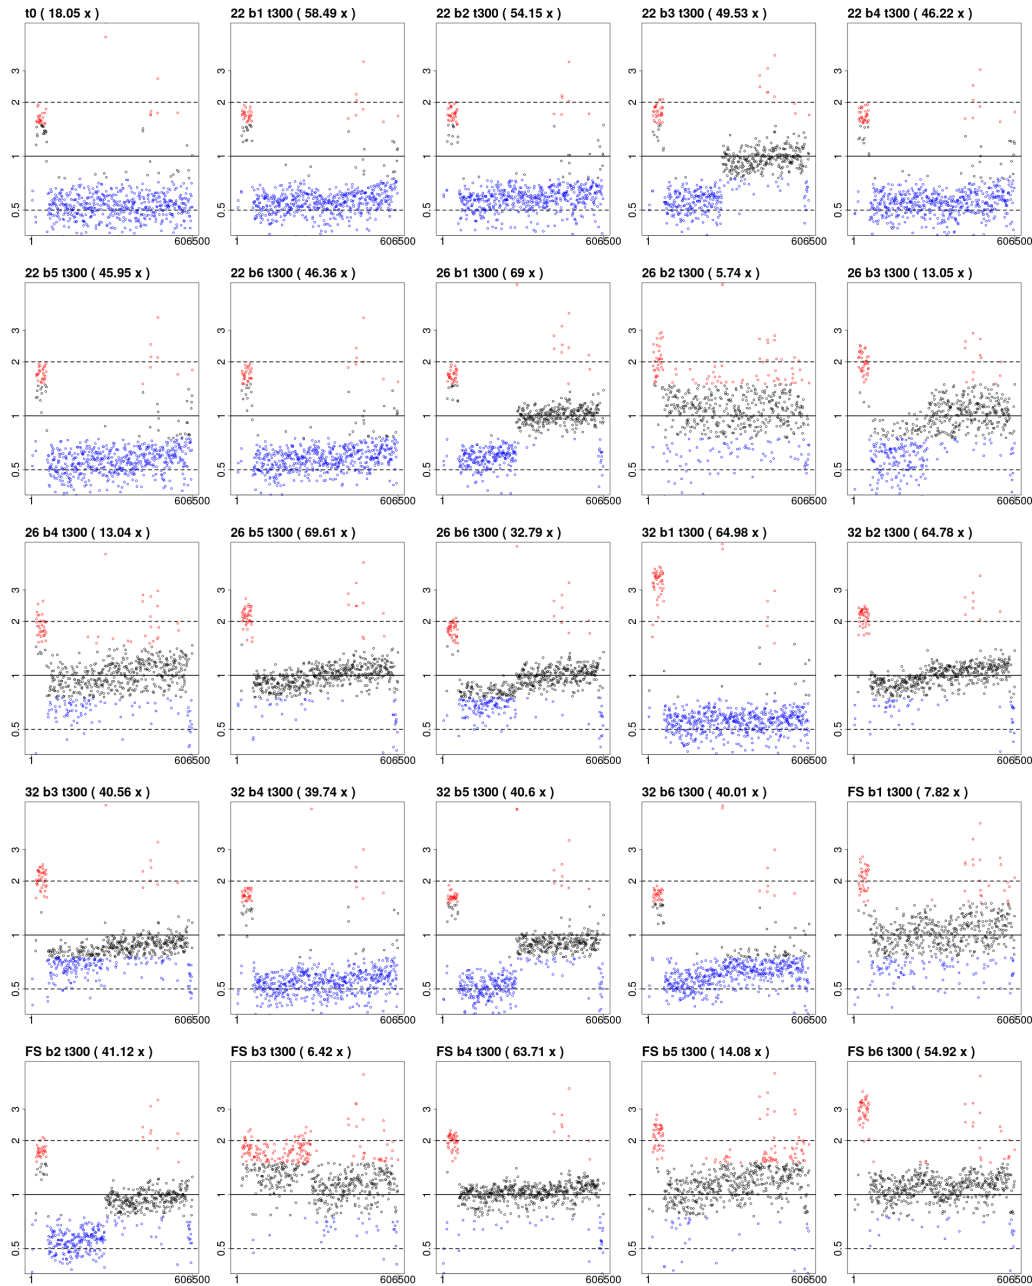

**Figure S11| Copy-number variation in chromosome 19 THAPSchr\_19a\_19 genomic scaffold among populations.** The horizontal axis represents position on the chromosome. The vertical axis represents sequencing depth normalized against the sequencing depth for that population over the whole genome. To aid visual identification of differences in copy-number profile among populations, depths of greater than 1.5 x median are colored red and those less than 0.75 x median are colored blue.

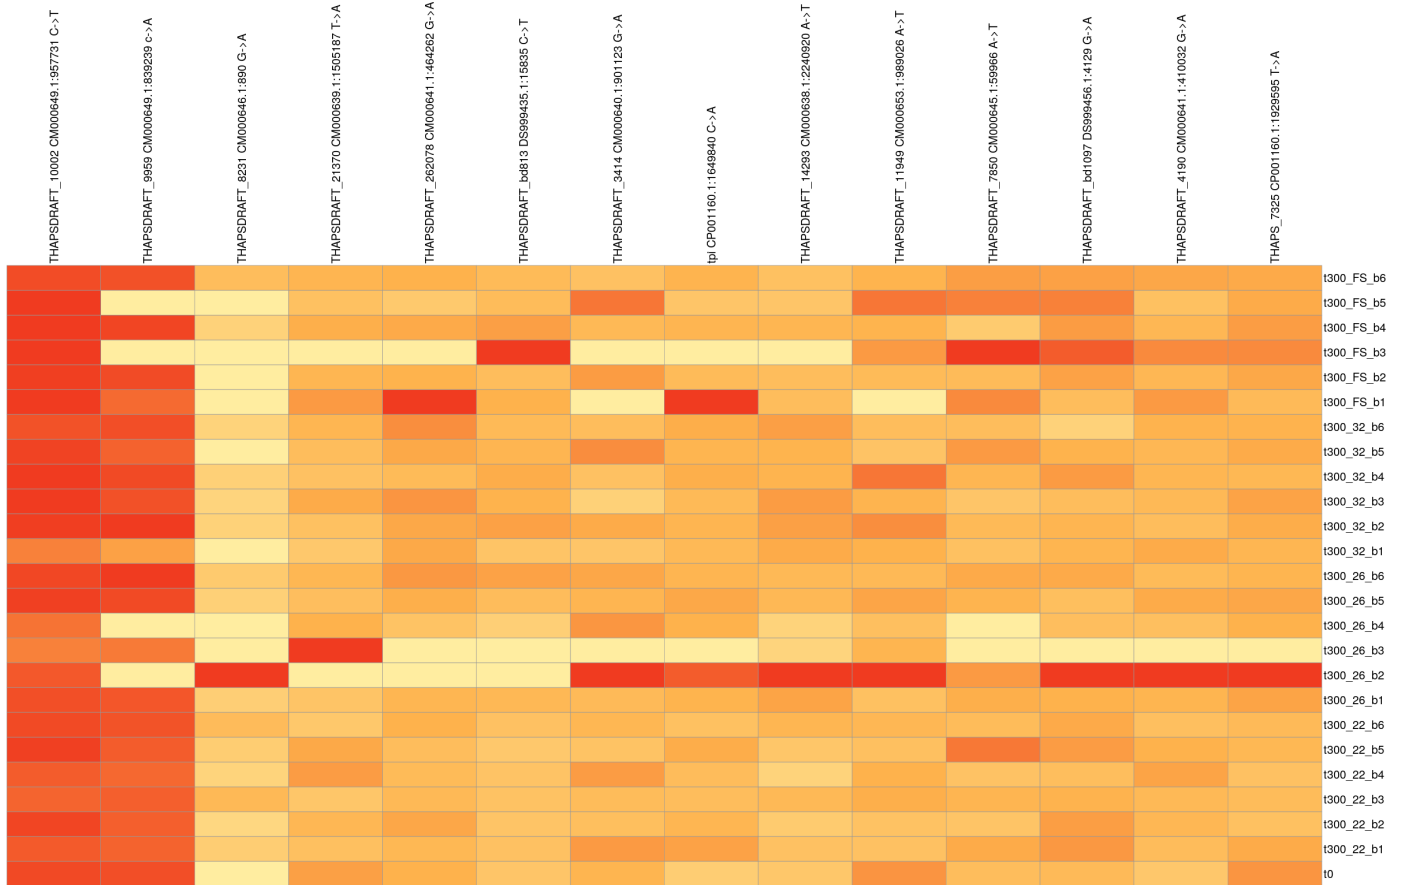

**Figure S12| Estimated allele frequencies for 14 single-nucleotide variants that introduce premature stop codons into *T. pseudonana* protein-coding genes.** Each variant had putatively reached fixation in at least one t300 population; i.e. the estimated allele proportion was 1 in at least one of these populations. Colour of each cell in the heat map indicates estimated allele proportion in the population, based on ratio of variant sequence reads versus total read depth at that genomic site. The colour range is such that homozygously fixed alleles appear as yellow or red while heterozygously fixed alleles will appear as orange.

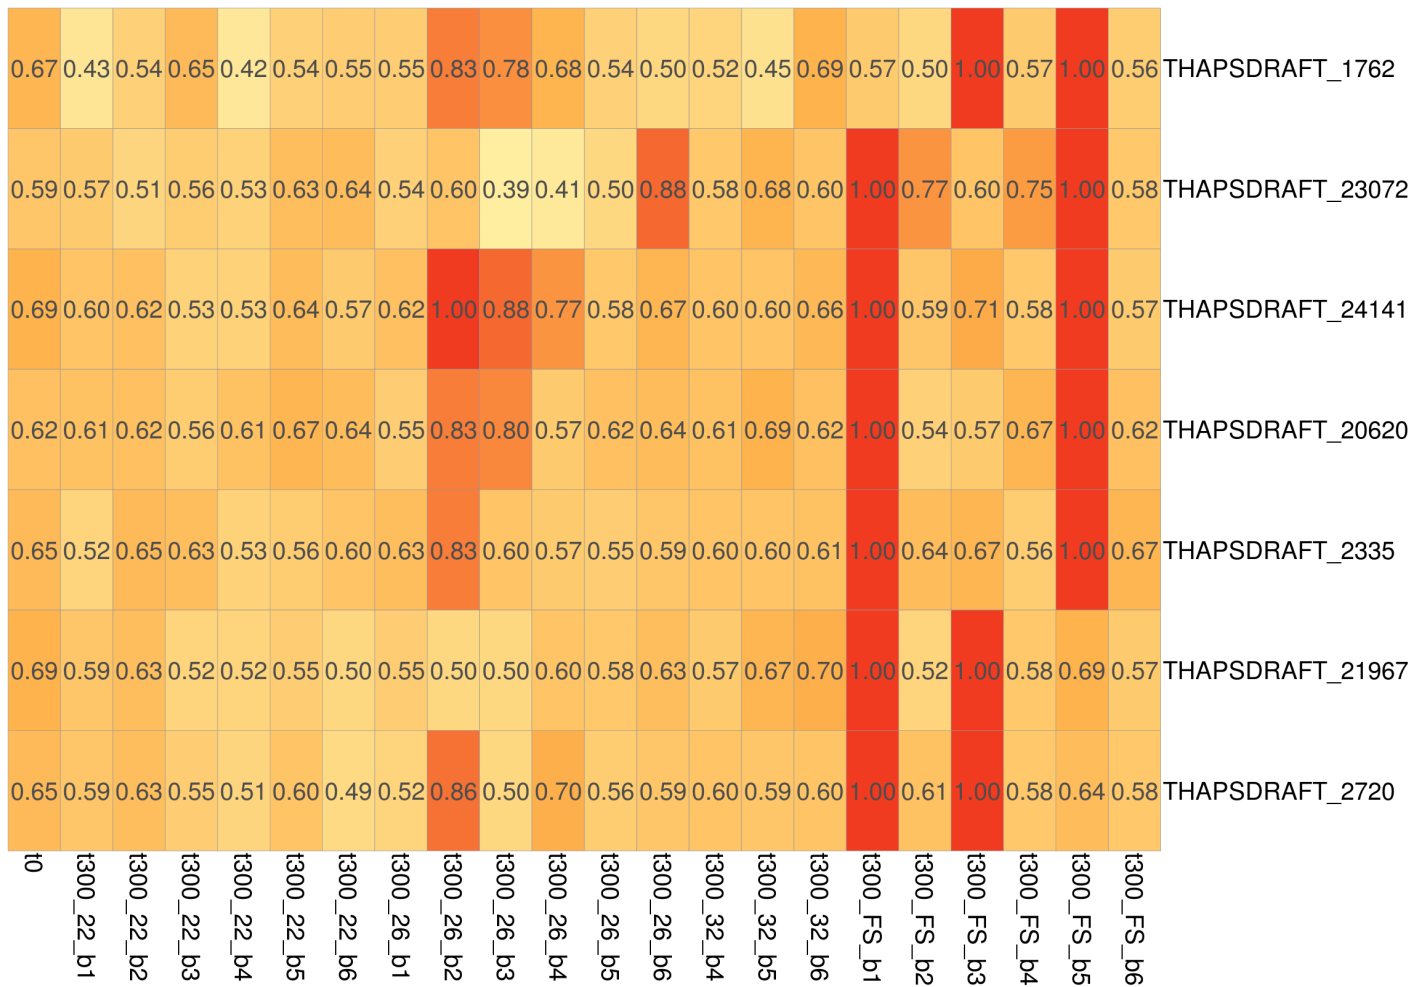

**Figure S13| Estimated allele frequencies for single-nucleotide variants in seven *T. pseudonana* protein-coding genes that have recurrently undergone fixation of a non-silent single-nucleotide variant.** Each variant had putatively reached fixation in more than one t300t (32°C or FS) population; that is the estimated allele proportion was 1 in two of these populations. Color of each cell in the heat map indicates estimated allele proportion in the population, based on ratio of variant sequence reads versus total read depth at that genomic site. The color range is such that homozygously fixed alleles will appear as yellow or red while heterozygously fixed alleles appear as orange. Variants have been aggregated by gene, such that each column represents one gene and where more than one variant occurs in a single gene in a single population, the color indicates the proportion of the variant that is most abundant in that population.]



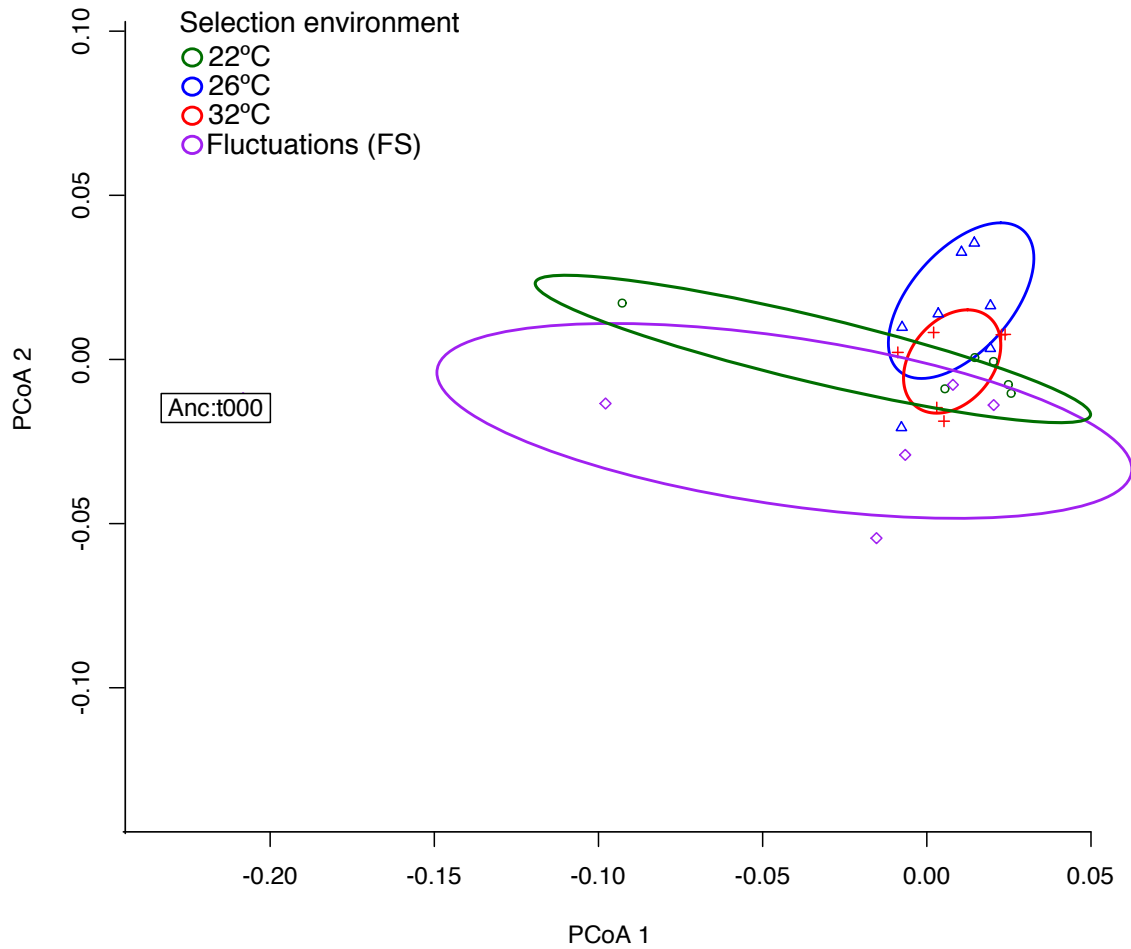

**Figure S14| Composition of bacterial communities across treatments.** Principal components analysis (PCA) of evolved and ancestral treatments, based on the Bray-Curtis index. While all samples are different from the ancestor, there are no systematic treatment specific differences in bacterial species composition. Colors denote the different treatments, with green for 22°C evolved samples, blue 26°C, red 32°C and purple, samples from the fluctuating treatments.

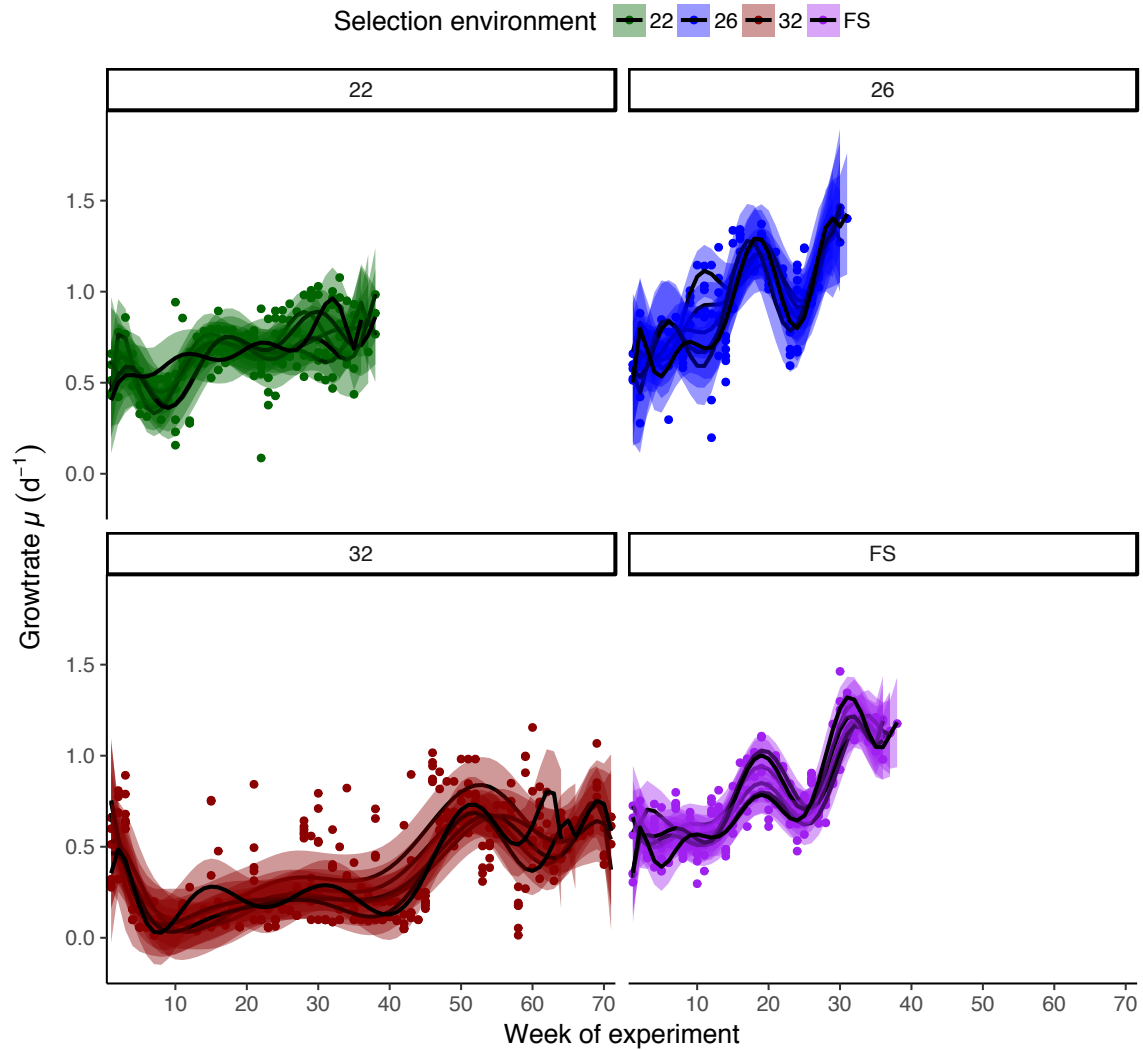

**Figure S15| Alternate version of Figure 1 (main manuscript) – per replicate trajectories of growth rate  $\mu$  in the different treatments.** While there is more variation between biological replicates in the 32°C treatment than in any other treatment, the timing and magnitude of responses are conserved and repeatable within each treatment. Trajectories were fitted with a GAMM on a per-replicate level. Colors indicate the different selection regimes with green for 22°C, blue for 26°C, red for 32°C and purple for the fluctuating treatment. Shaded areas around the GAMM are 1 s.e.

**Table S1| Summary of traits in ancestral and evolved populations.** All ancestral trait values were measured at 22°C. After 300 generations, they were measured in the evolved samples at the temperature of their selection environment. Responses for samples evolved in the fluctuating treatment were measured at 22°C, 26°C 32°C. For acute responses of FS-evolved lineages (i.e. metabolic traits and their thermal responses), they are displayed for 32°C to aid comparison with the populations experiencing constant severe warming. All data are reported as means  $\pm$  1 s.e.m. Abbreviations and acronyms are used as follows: C for carbon, N for nitrogen, P for phosphate, M, for the assimilation quotient of CO<sub>2</sub>:O<sub>2</sub>, *P* as gross photosynthesis ( $\mu\text{gC } \mu\text{gC}^{-1} \text{d}^{-1}$ ), *R* as respiration ( $\mu\text{gC } \mu\text{gC}^{-1} \text{d}^{-1}$ ), NP as net photosynthesis ( $\mu\text{gC } \mu\text{gC}^{-1} \text{d}^{-1}$ ) taking into account 12 hours of photosynthesis and 24 of respiration,  $\Phi_{\text{PSII}}$  as photosynthetic efficiency of PS II at 100 $\mu\text{mol quanta m}^{-2} \text{s}^{-1}$  (approximate light intensity in incubators), CUE as carbon use efficiency (1-*R/P* – as extracted from the thermal tolerance curves in Figure 2) and the metabolic traits describing the shape of unimodal thermal reaction norms are *E<sub>a</sub>*, *P(T<sub>c</sub>)*, *R(T<sub>c</sub>)*, *T<sub>h</sub>*, *E<sub>h</sub>* and *T<sub>opt</sub>*.

|                                        | Ancestor<br>(at 22°C)             | 22°C                    | 26°C                    | 32°C                    | FS                       |                         |                 |
|----------------------------------------|-----------------------------------|-------------------------|-------------------------|-------------------------|--------------------------|-------------------------|-----------------|
| <b>Growth rate at t0 or t300</b>       | 0.63 $\pm$ 0.13                   | 0.77 $\pm$ 0.06         | 1.36 $\pm$ 0.05         | 0.63 $\pm$ 0.05         | 1.1 $\pm$ 0.08           |                         |                 |
| <b>Geometric mean growth rate</b>      | 0.63 $\pm$ 0.13                   | 0.71 $\pm$ 0.08         | 1.08 $\pm$ 0.11         | 0.24 $\pm$ 0.11         | 0.87 $\pm$ 0.12          |                         |                 |
| Cellular<br>traits                     | <b>Chl:C</b><br>(mg:mg)           | 0.024 $\pm$ 0.007       | 0.071 $\pm$ 0.002       | 0.121 $\pm$ 0.002       | 0.088 $\pm$ 0.007        | 0.085 $\pm$ 0.007       |                 |
|                                        | <b>C:N</b><br>(mol:mol)           | 7.07 $\pm$ 0.07         | 6.94 $\pm$ 0.12         | 7.08 $\pm$ 0.08         | 7.21 $\pm$ 0.14          | 7.18 $\pm$ 0.21         |                 |
|                                        | <b>C:P</b><br>(mol:mol)           | 70.78 $\pm$ 2.87        | 69.91 $\pm$ 2.75        | 84.91 $\pm$ 2.21        | 112.93 $\pm$ 3.71        | 93.22 $\pm$ 8.99        |                 |
|                                        | <b>N:P</b><br>(mol:mol)           | 10.16 $\pm$ 0.33        | 10.14 $\pm$ 0.39        | 12.75 $\pm$ 0.41        | 15.07 $\pm$ 0.26         | 13.21 $\pm$ 0.55        |                 |
|                                        | <b>M</b><br>(CN/CN+2)             | 0.779                   | 0.778                   | 0.780                   | 0.783                    | 0.782                   |                 |
|                                        | <b>C</b> (pmol/cell)              | 9.97 $\pm$ 1.09         | 13.87 $\pm$ 0.81        | 19.66 $\pm$ 0.82        | 18.37 $\pm$ 1.12         | 19.21 $\pm$ 0.75        |                 |
|                                        | <b>N</b> (pmol/cell)              | 1.41 $\pm$ 0.14         | 1.98 $\pm$ 0.09         | 2.76 $\pm$ 0.13         | 2.53 $\pm$ 0.08          | 2.67 $\pm$ 0.11         |                 |
|                                        | <b>P</b> (pmol/cell)              | 0.139 $\pm$ 0.017       | 0.13 $\pm$ 0.009        | 0.216 $\pm$ 0.008       | 0.168 $\pm$ 0.019        | 0.202 $\pm$ 0.016       |                 |
|                                        | <b>Silicate</b> (pmol /cell)      | 0.353 $\pm$ 0.061       | 0.317 $\pm$ 0.025       | 0.346 $\pm$ 0.023       | 0.168 $\pm$ 0.077        | 0.311 $\pm$ 0.02        |                 |
|                                        | <b>Volume</b> ( $\mu\text{m}^3$ ) | 3794.25 $\pm$<br>680.96 | 3610.65 $\pm$<br>789.14 | 6359.75<br>$\pm$ 818.17 | 13582.53 $\pm$<br>692.95 | 4643.54 $\pm$<br>673.61 |                 |
|                                        | Metabolic<br>traits               | <b><i>P</i></b>         | 19.95 $\pm$ 1.32        | 17.05 $\pm$ 3.25        | 10.14 $\pm$ 0.45         | 9.68 $\pm$ 0.11         | 9.95 $\pm$ 1.05 |
|                                        |                                   | <b><i>R</i></b>         | 9.97 $\pm$ 0.12         | 6.76 $\pm$ 1.59         | 2.01 $\pm$ 0.06          | 4.23 $\pm$ 1.61         | 2.67 $\pm$ 0.07 |
| <b><i>NP</i></b>                       |                                   | 0.95 $\pm$ 0.04         | 1.86 $\pm$ 0.54         | 3.06 $\pm$ 0.27         | 0.61 $\pm$ 0.09          | 2.30 $\pm$ 0.60         |                 |
| <b><math>\Phi_{\text{PSII}}</math></b> |                                   | 0.41 $\pm$ 0.005        | 0.27 $\pm$ 0.006        | 0.29 $\pm$ 0.01         | 0.13 $\pm$ 0.04          | 0.24 + 0.02             |                 |
| <b>CUE</b>                             |                                   | 0.54 $\pm$ 0.12         | 0.62 $\pm$ 0.04         | 0.81 $\pm$ 0.10         | 0.57 $\pm$ 0.03          | 0.74 $\pm$ 0.01         |                 |
| Thermal<br>tolerance of<br>growth      | <b><i>E<sub>a</sub></i></b> (eV)  | 0.36 $\pm$ 0.19         | 0.25 $\pm$ 0.08         | 0.57 $\pm$ 0.1          | 0.57 $\pm$ 0.09          | 0.91 $\pm$ 0.1          |                 |
|                                        | <b><math>\mu(T_c)</math></b>      | -0.47 $\pm$ 0.11        | -0.5 $\pm$ 0.11         | -0.46 $\pm$ 0.15        | -1.18 $\pm$ 0.16         | -1.1 $\pm$ 0.16         |                 |
|                                        | <b><i>E<sub>h</sub></i></b> (eV)  | 6.11 $\pm$ 2.95         | 4.8 $\pm$ 0.93          | 7.32 $\pm$ 1.29         | 2.86 $\pm$ 1.28          | 4.14 $\pm$ 1.29         |                 |

|                               |                |                   |                   |                                       |                   |                   |
|-------------------------------|----------------|-------------------|-------------------|---------------------------------------|-------------------|-------------------|
|                               | $T_h$ (K)      | $305.46 \pm 1.77$ |                   | No treatment effect $308.16 \pm 0.35$ |                   |                   |
|                               | $T_{opt}$ (°C) | $28.69 \pm 0.61$  | $30.89 \pm 0.16$  | $32.14 \pm 0.29$                      | $31.08 \pm 0.62$  | $33.90 \pm 0.92$  |
|                               | $E_a$ (eV)     | $1.07 \pm 0.16$   |                   | No treatment effect $0.87 \pm 0.03$   |                   |                   |
| Thermal<br>response of<br>$P$ | $P(T_c)$       | $2.31 \pm 0.12$   | $2.29 \pm 0.05$   | $1.89 \pm 0.09$                       | $2.10 \pm 0.03$   | $1.84 \pm 0.09$   |
|                               | $E_h$ (eV)     | $3.51 \pm 0.29$   | $3.24 \pm 0.28$   | $3.17 \pm 0.39$                       | $2.98 \pm 0.36$   | $2.13 \pm 0.36$   |
|                               | $T_h$ (K)      | $303.41 \pm 0.94$ | $306.49 \pm 0.55$ | $306.49 \pm 0.55$                     | $306.49 \pm 0.55$ | $306.49 \pm 0.55$ |
|                               | $T_{opt}$ (°C) | $27.27 \pm 0.7$   | $30.86 \pm 0.02$  | $32.03 \pm 0.01$                      | $31.14 \pm 0.04$  | $33.37 \pm 0.06$  |
|                               | $E_a$ (eV)     | $1.07 \pm 0.16$   |                   | No treatment effect $0.83 \pm 0.04$   |                   |                   |
| Thermal<br>response of<br>$R$ | $R(T_c)$       | $1.71 \pm 0.09$   | $1.41 \pm 0.08$   | $0.49 \pm 0.03$                       | $1.12 \pm 0.08$   | $0.52 \pm 0.02$   |
|                               | $E_h$ (eV)     | $2.54 \pm 0.14$   | $3.35 \pm 0.46$   | $2.66 \pm 0.6$                        | $2.93 \pm 0.52$   | $1.74 \pm 0.54$   |
|                               | $T_h$ (K)      | $305.25 \pm 0.94$ |                   | No treatment effect $307.74 \pm 0.81$ |                   |                   |
|                               | $T_{opt}$ (°C) | $28.82 \pm 0.36$  | $31.99 \pm 0.01$  | $32.62 \pm 0.62$                      | $31.83 \pm 0.42$  | $33.95 \pm 0.92$  |

**Table S2 | Model selection on generalised additive mixed effects model (GAMM) fitted to the trajectories of population growth.** We fitted a GAMM to test whether the trajectories of population growth differed among the selection regimes. In the model, the effect of ‘treatment’ assesses whether median log-growth rates differ among selection regimes, while  $s(\text{day.of.exp, by = selection regime})$  indicates whether the trajectories of growth rate differ among the selection regimes. Models were compared via the small sample-size corrected Akaike Information Criterion (AICc), delta AICc is the difference in AICc score relative to the model with the lowest value (most parsimonious model) and Weight is the relative support for the model. The best fitting models were selected as those returning the lowest AICc score and the highest AICc weight and are highlighted in bold.

**Model selection table**

| formula = $\mu_{ie} \sim \text{treatment} + s(\text{day.of.exp, by = selection regime, bs}=\text{'cr'})$ , random = $\sim 1$   selection regime/replicate |                  |                                 |                         |           |               |               |              |               |
|-----------------------------------------------------------------------------------------------------------------------------------------------------------|------------------|---------------------------------|-------------------------|-----------|---------------|---------------|--------------|---------------|
|                                                                                                                                                           | <b>Intercept</b> | <b>s(day.of.exp, treatment)</b> | <b>selection regime</b> | <b>df</b> | <b>logLik</b> | <b>AICc</b>   | <b>Delta</b> | <b>Weight</b> |
| <b>4 (full model)</b>                                                                                                                                     | <b>0.71</b>      | <b>+</b>                        | <b>+</b>                | <b>15</b> | <b>276.1</b>  | <b>-525.0</b> | <b>0</b>     | <b>0.87</b>   |
| 2                                                                                                                                                         | 0.73             | +                               |                         | 12        | 271.99        | -521.2        | 3.80         | 0.13          |
| 1                                                                                                                                                         | 0.70             |                                 |                         | 4         | -50.26        | 399.0         | 923.93       | 0             |
| 3                                                                                                                                                         | 0.66             | +                               |                         | 7         | -49.28        | 405.5         | 930.44       | 0             |

**Table S3 | Model selection on generalised additive mixed effects model (GAMM) fitted to the trajectories of population size.** We fitted a GAMM to test whether the trajectories of population size differed among the selection regimes. In the model, the effect of ‘treatment’ assesses whether median log-population size differ among selection regimes, while s(day.of.exp, by = treatment) indicates whether the trajectories of growth population size differ among the selection regimes. Models were compared via the small sample-size corrected Akaike Information Criterion (AICc), delta AICc is the difference in AICc score relative to the model with the lowest value (most parsimonious model) and Weight is the relative support for the model. The best fitting models were selected as those returning the lowest AICc score and the highest AICc weight and are highlighted in bold.

**Model selection table**

|                       | formula = pop size~ treatment + s(day.of.exp, by = selection regime, bs='cr'), random = ~ 1   selection regime/replicate |                          |                  |           |         |        |       |        |
|-----------------------|--------------------------------------------------------------------------------------------------------------------------|--------------------------|------------------|-----------|---------|--------|-------|--------|
|                       | Intercept                                                                                                                | s(day.of.exp, treatment) | selection regime | df        | Log Lik | AICc   | Delta | Weight |
| <b>4 (full model)</b> | 7.018                                                                                                                    | +                        | +                | <b>11</b> | -489.3  | 9809.5 | 0     | 0.927  |
| 2                     | 7.16                                                                                                                     | +                        |                  | 8         | -489.9  | 9814.6 | 5.07  | 0.073  |
| 3                     | 6.905                                                                                                                    |                          |                  | 7         | -493.8  | 9891.4 | 81.88 | 0      |
| 1                     | 6.998                                                                                                                    | +                        |                  | 4         | -494.3  | 9894.4 | 84.92 | 0      |

**Table S4 | Thermal tolerance curve parameters for the ancestor.** The thermal tolerance curve was quantified by fitting Eq. (6) to the growth rates quantified over a temperature gradient from 15°C to 40°C. CI (95%) are the lower and upper 95% confidence intervals.

| Parameter  | Environment | Estimate               | CI (95%) [lower, upper]            |
|------------|-------------|------------------------|------------------------------------|
| $\mu(T_c)$ | 22          | -0.47                  | [-1.12,-0.27]                      |
| $E_a$      | 22          | 0.35                   | [0.31,1.13]                        |
| $E_h$      | 22          | 6.12                   | [6.04,12.11]                       |
| $T_h$      | 22          | 305.46 K or<br>32.31°C | [301.75,309.1] or °C [28.62,36.01] |

**Table S5 | Model selection and parameters of thermal tolerance curves of the evolved lineages.** The mechanistic temperature dependence function (see Eq. (6), also Fig. 1) was fitted to the growth rate quantified over a temperature gradient from 15°C to 40°C for all evolved lineages (see table S4 for analysis of the ancestor). Models included random effects on each of the parameters of Eq. (6) by replicate and ‘selection environment’ as a fixed four level factor on each parameter. Models were compared via the small sample-size corrected Akaike Information Criterion (AICc), delta AICc is the difference in AICc score relative to the model with the lowest value (most parsimonious model) and Weight is the relative support for the model. The best fitting models were selected as those returning the lowest AICc score and the highest AICc weight and are highlighted in bold. In the model output, CI (95%) are the lower and upper 95% confidence intervals.

**Model selection table**

| Model name       | Remove selection environment effect on | K         | AICc          | Delta    | Weight      | Log lik       |
|------------------|----------------------------------------|-----------|---------------|----------|-------------|---------------|
| <b>resl.mix3</b> | $T_h$                                  | <b>18</b> | <b>218.81</b> | <b>0</b> | <b>0.78</b> | <b>-88.65</b> |
| resl.mix7        | $E_h + T_h$                            | 15        | 222.04        | 3.22     | 0.16        | -94.13        |
| resl.mix         | NA - full model                        | 21        | 223.81        | 4.99     | 0.06        | -87.09        |
| resl.mix11       | $E_a + E_h + T_h$                      | 12        | 239.43        | 20.62    | 0           | -106.52       |
| resl.mix6        | $E_a + T_h$                            | 15        | 239.93        | 21.11    | 0           | -103.07       |
| resl.mix4        | $\mu(T_c)$                             | 18        | 242.31        | 23.49    | 0           | -100.39       |
| resl.mix14       | $\mu(T_c) + E_h + T_h$                 | 12        | 243.14        | 24.32    | 0           | -108.37       |
| resl.mix12       | $\mu(T_c) + E_a + E_h$                 | 12        | 250.66        | 31.85    | 0           | -112.13       |
| resl.mix15       | All                                    | 9         | 251.98        | 33.16    | 0           | -116.31       |
| resl.mix2        | $E_h$                                  | 18        | 286.3         | 67.49    | 0           | -122.39       |
| resl.mix13       | $\mu(T_c) + E_a + T_h$                 | 12        | 299.85        | 81.04    | 0           | -136.73       |
| resl.mix10       | $\mu(T_c) + T_h$                       | 15        | 305.06        | 86.25    | 0           | -135.64       |
| resl.mix1        | $E_a$ - no convergence                 |           |               |          |             |               |
| resl.mix5        | $E_a + E_h$ - no convergence           |           |               |          |             |               |

**Model parameters**

| Parameter  | Environment | Estimate | CI (95%) [lower, upper] |
|------------|-------------|----------|-------------------------|
| $\mu(T_c)$ | 22          | -0.5     | [-0.71,-0.29]           |
| $\mu(T_c)$ | 26          | -0.46    | [-0.97,-0.01]           |
| $\mu(T_c)$ | 32          | -1.18    | [-1.69,-0.66]           |
| $\mu(T_c)$ | FS          | -1.1     | [-1.62,-0.57]           |



|            |                     |                        |                                      |
|------------|---------------------|------------------------|--------------------------------------|
| $E_a$ (eV) | 22                  | 0.25                   | [0.11,0.51]                          |
| $E_a$ (eV) | 26                  | 0.57                   | [0.21,0.91]                          |
| $E_a$ (eV) | 32                  | 0.57                   | [0.23, 0.91]                         |
| $E_a$ (eV) | FS                  | 0.91                   | [0.57,1.25]                          |
| $E_h$ (eV) | 22                  | 4.8                    | [2.31,5.85]                          |
| $E_h$ (eV) | 26                  | 7.32                   | [3.28,12.13]                         |
| $E_h$ (eV) | 32                  | 2.86                   | [0.01,6.98]                          |
| $E_h$ (eV) | FS                  | 4.14                   | [0.07,8.90]                          |
| $T_h$      | No treatment effect | 308.16 K or<br>35.01°C | [307.49,308.82] or °C [34.34, 35.67] |

---

**Table S6 | Model selection and parameters for the thermal responses of gross photosynthesis and respiration in the ancestor.** Eq. (6) was fitted to the metabolic rates quantified over a temperature gradient from 7°C to 40°C (3°C increments) for the ancestor using a non-linear mixed effects model. “Flux”, i.e. respiration or photosynthesis, was fitted as a fixed two-level factor to test for differences in thermal responses for photosynthesis (P) and respiration (R), and model selection otherwise proceeded as described above. Models were compared via the small sample-size corrected Akaike Information Criterion (AICc), delta AICc is the difference in AICc score relative to the model with the lowest value (most parsimonious model) and Weight is the relative support for the model. The best fitting models were selected as those returning the lowest AICc score and the highest AICc weight and are highlighted in bold.

| <b>Model selection</b> |                                |          |             |              |               |                |
|------------------------|--------------------------------|----------|-------------|--------------|---------------|----------------|
| <b>Model name</b>      | <b>Remove “flux” effect on</b> | <b>K</b> | <b>AICc</b> | <b>Delta</b> | <b>Weight</b> | <b>Log Lik</b> |
| Mod4                   | <i>E<sub>a</sub></i>           | 8        | 217.19      | 0            | 0.976         | -100.595       |
| Mod2                   | <i>P(T<sub>c</sub>)</i>        | 9        | 225.44      | 8.25         | 0.015         | -103.72        |
| Mod1                   | <i>E<sub>h</sub></i>           | 10       | 227.62      | 10.43        | 0.005         | -103.81        |
| Mod3                   | <i>T<sub>h</sub></i>           | 8        | 229.01      | 11.82        | 0.002         | -106.505       |

  

| <b>Parameters</b>           |                          |                                       |
|-----------------------------|--------------------------|---------------------------------------|
| <b>Parameter</b>            | <b>Estimate</b>          | <b>CI 95% [lower, upper]</b>          |
| <i>E<sub>a</sub></i> (eV)   | 1.07                     | [0.73,1.44]                           |
| <i>P(T<sub>c</sub>)</i>     | 2.31                     | [2.25,2.57]                           |
| <i>R(T<sub>c</sub>)</i>     | 1.71                     | [1.11,1.99]                           |
| <i>E<sub>h</sub>.P</i> (eV) | 3.51                     | [3.17,4.39]                           |
| <i>E<sub>h</sub>.R</i> (eV) | 2.54                     | [2.35,3.53]                           |
| <i>T<sub>h</sub>.P</i> (K)  | 303.41 (K)<br>or 30.26°C | [301.29,305.9] or °C<br>[28.14,32.8]  |
| <i>T<sub>h</sub>.R</i> (K)  | 305.25 or<br>32.10°C     | [294.88,306.9] or °C<br>[21.73,33.84] |

**Table S7| Model selection and parameters for the thermal response of gross photosynthesis in the evolved lineages.** Eq. (6) was fitted to the metabolic rates quantified over a temperature gradient from 7°C to 40°C (3°C increments) for the evolved lineages using a non-linear mixed effects model. “Selection regime” was fitted as a fixed factor to test for differences in the parameters characterizing the thermal response for photosynthesis among the selection regimes. Models were compared via the small sample-size corrected Akaike Information Criterion (AICc), delta AICc is the difference in AICc score relative to the model with the lowest value (most parsimonious model) and Weight is the relative support for the model. The best fitting models were selected as those returning the lowest AICc score and the highest AICc weight and are highlighted in bold.

**Model selection table**

| Model name     | Remove selection regime effect on | K         | AICc          | Delta    | Weight      | Log Lik        |
|----------------|-----------------------------------|-----------|---------------|----------|-------------|----------------|
| <b>gp.mix6</b> | <b><math>E_a + T_h</math></b>     | <b>14</b> | <b>300.28</b> | <b>0</b> | <b>0.46</b> | <b>-135.21</b> |
| gp.mix11       | $E_a + E_h + T_h$                 | 11        | 302.78        | 2.5      | 0.13        | -139.81        |
| gp.mix15       | All                               | 8         | 303.34        | 3.06     | 0.1         | -143.36        |
| gp.mix3        | $T_h$                             | 17        | 303.61        | 3.33     | 0.09        | -133.43        |
| gp.mix1        | $E_a$                             | 17        | 303.74        | 3.46     | 0.08        | -133.5         |
| gp.mix8        | $P(T_c) + E_a$                    | 14        | 304.08        | 3.81     | 0.07        | -137.11        |
| gp.mix12       | $P(T_c) + E_a + E_h$              | 11        | 305.4         | 5.12     | 0.04        | -141.12        |
| gp.mix7        | $E_h + T_h$                       | 14        | 307.32        | 7.04     | 0.01        | -138.73        |
| gp.mix14       | $P(T_c) + E_h + T_h$              | 11        | 307.72        | 7.44     | 0.01        | -142.28        |
| gp.mix         | NA - full model                   | 20        | 309.34        | 9.06     | 0           | -132.76        |
| gp.mix4        | $P(T_c)$                          | 17        | 309.64        | 9.36     | 0           | -136.45        |
| gp.mix2        | $E_h$                             | 17        | 310.05        | 9.78     | 0           | -136.65        |
| gp.mix13       | $P(T_c) + E_a + T_h$              | 11        | 312.68        | 12.41    | 0           | -144.77        |
| gp.mix5        | $E_a + E_h$ - no convergence      |           |               |          |             |                |
| gp.mix9        | $P(T_c) + E_h$ - no convergence   |           |               |          |             |                |

**Parameters**

| Treatment effect on | Environment         | Estimate | CI (95%)     |
|---------------------|---------------------|----------|--------------|
| $P(T_c)$            | 22                  | 2.29     | [2.19,2.35]  |
| $P(T_c)$            | 26                  | 1.89     | [1.70,2.16]  |
| $P(T_c)$            | 32                  | 2.10     | [2.03,2.14]  |
| $P(T_c)$            | FS                  | 1.84     | [-1.74,1.92] |
| $E_a$ (eV)          | No treatment effect | 0.87     | [0.81,0.94]  |

|            |                     |                          |                                      |
|------------|---------------------|--------------------------|--------------------------------------|
| $E_h$ (eV) | 22                  | 3.24                     | [2.71, 3.82]                         |
| $E_h$ (eV) | 26                  | 3.17                     | [1.95, 4.55]                         |
| $E_h$ (eV) | 32                  | 2.98                     | [1.74,4.23]                          |
| $E_h$ (eV) | FS                  | 2.13                     | [0.89, 3.41 ]                        |
| $T_h$      | No treatment effect | 306.49 K<br>(or 33.34°C) | [303.42, 307.57] Or °C [30.27,34.42] |

---

**Table S8 | Model selection and parameters for the thermal response of respiration in the evolved lineages.** Eq. (6) was fitted to the metabolic rates quantified over a temperature gradient from 7°C to 40°C (3°C increments) for the evolved lineages using a non-linear mixed effects model. “Selection regime” was fitted as a fixed factor to test for differences in the parameters characterizing the thermal response for respiration among the selection regimes. Models were compared via the small sample-size corrected Akaike Information Criterion (AICc), delta AICc is the difference in AICc score relative to the model with the lowest value (most parsimonious model) and Weight is the relative support for the model. The best fitting models were selected as those returning the lowest AICc score and the highest AICc weight and are highlighted in bold.

| <b>Model selection table</b> |                                               |           |               |              |               |                |
|------------------------------|-----------------------------------------------|-----------|---------------|--------------|---------------|----------------|
| <b>Model name</b>            | <b>Remove selection environment effect on</b> | <b>K</b>  | <b>AICc</b>   | <b>Delta</b> | <b>Weight</b> | <b>Log Lik</b> |
| <b>r.mix6</b>                | $E_a + T_h$                                   | <b>15</b> | <b>279.94</b> | <b>0</b>     | <b>0.64</b>   | <b>-123.83</b> |
| <b>r.mix11</b>               | $E_a + E_h + T_h$                             | <b>12</b> | <b>281.84</b> | <b>1.9</b>   | <b>0.25</b>   | <b>-128.19</b> |
| r.mix1                       | $E_a$                                         | 18        | 284.95        | 5.01         | 0.05          | -122.82        |
| r.mix3                       | $T_h$                                         | 18        | 285.45        | 5.51         | 0.04          | -123.07        |
| r.mix7                       | $E_h + T_h$                                   | 15        | 288.51        | 8.57         | 0.01          | -128.11        |
| r.mix15                      | All                                           | 9         | 290.74        | 10.81        | 0             | -135.96        |
| r.mix                        | NA- full model                                | 21        | 291.51        | 11.57        | 0             | -122.49        |
| r.mix8                       | $R(T_c) + E_a$                                | 15        | 293.18        | 13.24        | 0             | -130.45        |
| r.mix12                      | $R(T_c) + E_a + E_h$                          | 12        | 293.77        | 13.83        | 0             | -134.15        |
| r.mix9                       | $R(T_c) + E_h$                                | 15        | 295.98        | 16.05        | 0             | -131.85        |
| r.mix14                      | $R(T_c) + E_h + T_h$                          | 12        | 297.2         | 17.26        | 0             | -135.87        |
| r.mix4                       | $R(T_c)$                                      | 18        | 299.26        | 19.32        | 0             | -129.98        |
| r.mix2                       | $E_h$                                         | 18        | 299.37        | 19.43        | 0             | -130.03        |
| r.mix10                      | $R(T_c) + T_h$                                | 15        | 303.08        | 23.14        | 0             | -135.4         |
| r.mix13                      | $R(T_c) + E_a + T_h$                          | 12        | 306.02        | 26.08        | 0             | -140.28        |
| r.mix5                       | $E_a + E_h$ - no convergence                  |           |               |              |               |                |

| <b>Evolved samples - components of the two best models</b> |           |               |             |              |               |
|------------------------------------------------------------|-----------|---------------|-------------|--------------|---------------|
|                                                            | <b>df</b> | <b>logLik</b> | <b>AICc</b> | <b>Delta</b> | <b>weight</b> |
| r.mix6                                                     | 15        | -123.83       | 279.94      | 0            | 0.72          |
| r.mix11                                                    | 12        | -128.19       | 281.84      | 1.9          | 0.28          |

  

| <b>Parameter estimates for Delta AICc &lt;2</b> |          |            |            |         |          |
|-------------------------------------------------|----------|------------|------------|---------|----------|
|                                                 | $R(T_c)$ | $E_a$ (eV) | $E_h$ (eV) | $T_h$ K | $T_h$ °C |
|                                                 |          |            |            |         |          |

|                                          |              |             |             |                       |               |
|------------------------------------------|--------------|-------------|-------------|-----------------------|---------------|
| 22 °C                                    | 1.41         | 0.83        | 3.35        | 307.47                | 34.59         |
| 26°C                                     | 0.49         | (no         | 2.66        | (no treatment effect) | (no treatment |
| 32°C                                     | 1.12         | treatment   | 2.93        |                       | effect)       |
| FS                                       | 0.52         | effect)     | 1.74        |                       |               |
| <b>Sum of AIC based relative weights</b> |              |             |             |                       |               |
|                                          | $R(T_c)$     | $E_a$ (eV)  | $E_h$ (eV)  | $T_h$                 |               |
|                                          | 0.99         | 0.05        | 0.73        | 0.05                  |               |
| <b>95% interval</b>                      |              |             |             |                       |               |
|                                          | $R(T_c)$     | $E_a$ (eV)  | $E_h$ (eV)  | $T_h$ K               | $T_h$ °C      |
| 22 °C                                    | [1.25, 1.44] | [0.71,0.84] | [2.43,4.26] | [305.82,310.5]        | [32.67,37.48] |
| 26°C                                     | [0.34, 0.87] | ( no        | [0.54,4.78] | (no treatment effect) |               |
| 32°C                                     | [1.10, 1.23] | treatment   | [0.96,4.87] |                       |               |
| FS                                       | [0.31, 0.98] | effect)     | [0.26,3.74] |                       |               |

**Table S9 | Model selection to determine the effects of selection regime on the carbon use efficiency.** We fitted the CUE data to a linear mixed model to test whether CUE differed among the selection regimes. Models were compared via the small sample-size corrected Akaike Information Criterion (AICc), delta AICc is the difference in AICc score relative to the model with the lowest value (most parsimonious model) and Weight is the relative support for the model. The best fitting models were selected as those returning the lowest AICc score and the highest AICc weight and are highlighted in bold. The best fitting model included differences in CUE among the selection regimes.

| <b>Model selection table</b>                            |                                                                          |                         |                                               |               |               |              |               |
|---------------------------------------------------------|--------------------------------------------------------------------------|-------------------------|-----------------------------------------------|---------------|---------------|--------------|---------------|
| Formula                                                 | fixed = cue ~ selection regime, random = ~1   selection regime/replicate |                         |                                               |               |               |              |               |
| <b>Model</b>                                            | <b>Intercept</b>                                                         | <b>selection regime</b> | <b>Df</b>                                     | <b>logLik</b> | <b>AICc</b>   | <b>Delta</b> | <b>weight</b> |
| <b>2</b>                                                | <b>0.63</b>                                                              | <b>+</b>                | <b>7</b>                                      | <b>35.84</b>  | <b>-53.70</b> | <b>0.00</b>  | <b>1.00</b>   |
| 1                                                       | 0.68                                                                     |                         | 3                                             | 22.37         | -38.00        | 15.69        | 0.00          |
| <b>Parameter estimates and 95% Confidence intervals</b> |                                                                          |                         |                                               |               |               |              |               |
| <b>Selection regime</b>                                 | <b>Parameter Estimate</b>                                                |                         | <b>95% Confidence interval [lower, upper]</b> |               |               |              |               |
| Ancestor                                                | 0.63                                                                     |                         | [0.59, 0.67]                                  |               |               |              |               |
| 22°C                                                    | 0.71                                                                     |                         | [0.65, 0.77]                                  |               |               |              |               |
| 26°C                                                    | 0.81                                                                     |                         | [0.77, 0.85]                                  |               |               |              |               |
| 32°C                                                    | 0.67                                                                     |                         | [0.61, 0.73]                                  |               |               |              |               |
| FS                                                      | 0.71                                                                     |                         | [0.69, 0.73]                                  |               |               |              |               |

**Table S10| Model selection for size, C, N, P, Si, RNA, and protein quota per cell volume as well as C:N, C:P, N:P, Chl:C ratio, and  $\Phi_{PSII}$  at irradiance as in the incubator for ancestral samples.** All traits were analyzed using separate mixed effects models, where ‘assay temperature’ ranging from 15°C to 35°C was a fixed effect and replicate nested within temperature was a random effect. In all traits, there was a significant effect of the assay temperature on the trait value. Model selection was carried out based on lowest AICc score and are highlighted in bold. Parameter estimates and 95% confidence intervals are presented below.

**Model selections**

| <b>Cell volume (<math>\mu\text{m}^3</math>)</b>                  |              |          |          |               |              |          |                  |
|------------------------------------------------------------------|--------------|----------|----------|---------------|--------------|----------|------------------|
| Global Model: fixed = Size ~ assay temp, random = ~1   replicate |              |          |          |               |              |          |                  |
| Model                                                            | Chisq        | Assay T  | Df       | logLik        | AICc         | delta    | p                |
| <b>1</b>                                                         | <b>59.13</b> | <b>+</b> | <b>9</b> | <b>-14.14</b> | <b>46.29</b> | <b>0</b> | <b>&lt;0.001</b> |
| 2                                                                |              |          | 3        | -43.71        | 93.42        | 47.13    |                  |

  

| <b>C (pmol) per cell volume</b>                            |              |          |          |               |                |          |                  |
|------------------------------------------------------------|--------------|----------|----------|---------------|----------------|----------|------------------|
| : fixed = Cpervolume ~ assay temp, random = ~1   replicate |              |          |          |               |                |          |                  |
| Model                                                      | Chisq        | Assay T  | Df       | logLik        | AICc           | delta    | p                |
| <b>1</b>                                                   | <b>55.76</b> | <b>+</b> | <b>9</b> | <b>306.21</b> | <b>-594.42</b> | <b>0</b> | <b>&lt;0.001</b> |
| 2                                                          |              |          | 3        | 278.33        | -550.66        | 43.76    |                  |

  

| <b>N (pmol) per cell volume</b>                                       |              |          |          |               |                |          |                  |
|-----------------------------------------------------------------------|--------------|----------|----------|---------------|----------------|----------|------------------|
| Global Model: fixed = Npervolume~ assay temp, random = ~1   replicate |              |          |          |               |                |          |                  |
| Model                                                                 | Chisq        | Assay T  | Df       | logLik        | AICc           | delta    | p                |
| <b>1</b>                                                              | <b>43.78</b> | <b>+</b> | <b>9</b> | <b>381.66</b> | <b>-745.31</b> | <b>0</b> | <b>&lt;0.001</b> |
| 2                                                                     |              |          | 3        | 359.76        | -713.53        | 31.73    |                  |

  

| <b>P (pmol) per cell volume</b>                                       |              |          |          |               |                |          |                  |
|-----------------------------------------------------------------------|--------------|----------|----------|---------------|----------------|----------|------------------|
| Global Model: fixed = Ppervolume~ assay temp, random = ~1   replicate |              |          |          |               |                |          |                  |
| Model                                                                 | Chisq        | Assay T  | Df       | logLik        | AICc           | delta    | p                |
| <b>1</b>                                                              | <b>37.44</b> | <b>+</b> | <b>9</b> | <b>508.74</b> | <b>-999.48</b> | <b>0</b> | <b>&lt;0.001</b> |
| 2                                                                     |              |          | 3        | 490.02        | -974.03        | 25.45    |                  |

  

| <b>Total protein (ng) per cell volume</b>                                |              |          |          |               |                |          |                  |
|--------------------------------------------------------------------------|--------------|----------|----------|---------------|----------------|----------|------------------|
| Global Model: fixed = Protpervolume~ assay temp, random = ~1   replicate |              |          |          |               |                |          |                  |
| Model                                                                    | Chisq        | Assay T  | Df       | logLik        | AICc           | delta    | p                |
| <b>1</b>                                                                 | <b>46.41</b> | <b>+</b> | <b>9</b> | <b>578.35</b> | <b>-1138.7</b> | <b>0</b> | <b>&lt;0.001</b> |
| 2                                                                        |              |          | 3        | 555.15        | -1104.3        | 34.4     |                  |

  

| <b>Total RNA(pg) per cell volume</b> |  |  |  |  |  |  |  |
|--------------------------------------|--|--|--|--|--|--|--|
|--------------------------------------|--|--|--|--|--|--|--|



| Global Model: fixed = RNAPERVOLUME ~ assay temp, random = ~1   replicate |              |          |          |               |                |          |                  |
|--------------------------------------------------------------------------|--------------|----------|----------|---------------|----------------|----------|------------------|
| Model                                                                    | Chisq        | Assay T  | Df       | logLik        | AICc           | delta    | p                |
| <b>1</b>                                                                 | <b>75.07</b> | <b>+</b> | <b>9</b> | <b>308.32</b> | <b>-598.65</b> | <b>0</b> | <b>&lt;0.001</b> |
| 2                                                                        |              |          | 3        | 270.79        | 530.51         | 63.08    |                  |

---

**Silicate (pmol) per cell volume**

---

| Global Model: fixed = Si ~ assay temp, random = ~1   replicate |              |          |          |               |                |          |                  |
|----------------------------------------------------------------|--------------|----------|----------|---------------|----------------|----------|------------------|
| Model                                                          | Chi          | AICc     | delta    | p             |                |          |                  |
| <b>1</b>                                                       | <b>22.74</b> | <b>+</b> | <b>9</b> | <b>306.39</b> | <b>-594.79</b> | <b>0</b> | <b>&lt;0.001</b> |
| 2                                                              |              |          | 3        | 295.02        | -584.04        | 10.75    |                  |

---

**C:N**

---

| Global Model: fixed = CN ~ assay temp, random = ~1   replicate |              |          |          |               |              |          |                 |
|----------------------------------------------------------------|--------------|----------|----------|---------------|--------------|----------|-----------------|
| Model                                                          | Chisq        | Assay T  | Df       | logLik        | AICc         | delta    | p               |
| <b>1</b>                                                       | <b>17.12</b> | <b>+</b> | <b>9</b> | <b>-44.78</b> | <b>107.6</b> | <b>0</b> | <b>&lt;0.01</b> |
| 2                                                              |              |          | 3        | -53.65        | 113.30       | 5.73     |                 |

---

**N:P**

---

| Global Model: fixed = NP ~ assay temp, random = ~1   replicate |              |          |          |               |               |          |                  |
|----------------------------------------------------------------|--------------|----------|----------|---------------|---------------|----------|------------------|
| Model                                                          | Chisq        | Assay T  | Df       | logLik        | AICc          | delta    | p                |
| <b>1</b>                                                       | <b>33.21</b> | <b>+</b> | <b>9</b> | <b>-96.55</b> | <b>211.11</b> | <b>0</b> | <b>&lt;0.001</b> |
| 2                                                              |              |          | 3        | -113.11       | 232.32        | 22.11    |                  |

---

**C:P**

---

| Global Model: fixed = CN ~ assay temp, random = ~1   replicate |              |          |          |                |               |          |                  |
|----------------------------------------------------------------|--------------|----------|----------|----------------|---------------|----------|------------------|
| Model                                                          | Chisq        | Assay T  | Df       | logLik         | AICc          | delta    | p                |
| <b>1</b>                                                       | <b>60.12</b> | <b>+</b> | <b>9</b> | <b>-163.18</b> | <b>344.62</b> | <b>0</b> | <b>&lt;0.001</b> |
| 2                                                              |              |          | 6        | -193.24        | 392.48        | 48.12    |                  |

---

**Chlorophyll:C ratio**

---

| Global Model: fixed = Chl:C ~ assay temp, random = ~1   selection regime/replicate |              |          |          |               |                |          |                  |
|------------------------------------------------------------------------------------|--------------|----------|----------|---------------|----------------|----------|------------------|
| Model                                                                              | Chisq        | Assay T  | Df       | logLik        | AICc           | delta    | p                |
| <b>1</b>                                                                           | <b>50.12</b> | <b>+</b> | <b>9</b> | <b>413.58</b> | <b>-121.84</b> | <b>0</b> | <b>&lt;0.001</b> |
| 2                                                                                  |              |          | 6        | 352.88        | -83.72         | 38.3     |                  |

---

**$\Phi_{PSII}$**

---

| Global Model: fixed = $\Phi_{PSII}$ ~ assay temp, random = ~1   replicate |              |          |          |              |               |          |                 |
|---------------------------------------------------------------------------|--------------|----------|----------|--------------|---------------|----------|-----------------|
| Model                                                                     | Chisq        | Assay T  | Df       | logLik       | AICc          | delta    | p               |
| <b>1</b>                                                                  | <b>13.71</b> | <b>+</b> | <b>4</b> | <b>16.44</b> | <b>-24.81</b> | <b>0</b> | <b>&lt;0.01</b> |

---



---

**Parameter estimates and lower and upper confidence intervals ('conf')**

| <b>Size in <math>\mu\text{m}</math></b> |          |            |            |
|-----------------------------------------|----------|------------|------------|
| Assay at                                | Estimate | conf lower | conf upper |
| 15°C                                    | 11.54    | 11.26      | 11.83      |
| 20°C                                    | 22.13    | 11.26      | 0.00       |
| 22°C                                    | 21.99    | 11.26      | 0.00       |
| 25°C                                    | 21.99    | 11.26      | 0.00       |
| 30°C                                    | 21.52    | 11.26      | 0.00       |
| 32°C                                    | 21.19    | 11.26      | 0.00       |
| 35°C                                    | 20.99    | 11.26      | 0.00       |

  

| <b>C (pmol) per cell volume</b> |          |            |            |
|---------------------------------|----------|------------|------------|
| Assay at                        | Estimate | conf lower | conf upper |
| 15°C                            | 1.79E-04 | 8.54E-05   | 2.73E-04   |
| 20°C                            | 2.32E-04 | 5.51E-06   | 4.59E-04   |
| 22°C                            | 2.27E-04 | 5.43E-08   | 4.54E-04   |
| 25°C                            | 2.71E-04 | 4.42E-05   | 4.98E-04   |
| 30°C                            | 5.55E-04 | 3.28E-04   | 7.81E-04   |
| 32°C                            | 6.04E-04 | 3.77E-04   | 8.31E-04   |
| 35°C                            | 7.42E-04 | 5.00E-04   | 9.84E-04   |

  

| <b>N (pmol) per cell volume</b> |          |            |            |
|---------------------------------|----------|------------|------------|
| Assay at                        | Estimate | conf lower | conf upper |
| 15°C                            | 3.01E-05 | 1.59E-05   | 4.43E-05   |
| 20°C                            | 3.04E-05 | -3.97E-06  | 6.48E-05   |
| 22°C                            | 3.37E-05 | -6.86E-07  | 6.81E-05   |
| 25°C                            | 3.51E-05 | 6.71E-07   | 6.95E-05   |
| 30°C                            | 7.77E-05 | 4.33E-05   | 1.12E-04   |
| 32°C                            | 7.53E-05 | 4.09E-05   | 1.10E-04   |
| 35°C                            | 9.50E-05 | 5.82E-05   | 1.32E-04   |

  

| <b>P (pmol) per cell volume</b> |          |            |            |
|---------------------------------|----------|------------|------------|
| Assay at                        | Estimate | conf lower | conf upper |
| 15°C                            | 2.8E-06  | 1.6E-07    | 1.8E-06    |
| 20°C                            | 3.8E-06  | 3.3E-07    | 3.9E-06    |
| 22°C                            | 4.0E-06  | 5.2E-07    | 3.6E-06    |

|      |         |         |         |
|------|---------|---------|---------|
| 25°C | 3.8E-06 | 2.6E-07 | 4.8E-06 |
| 30°C | 5.0E-06 | 1.5E-06 | 5.0E-06 |
| 32°C | 5.1E-06 | 1.6E-06 | 5.8E-06 |
| 35°C | 5.8E-06 | 2.2E-06 | 1.8E-06 |

**Protein (ng) per cell volume**

| Assay at | Estimate | conf lower | conf upper |
|----------|----------|------------|------------|
| 15°C     | 1.67E-07 | 6.26E-08   | 2.71E-07   |
| 20°C     | 3.38E-07 | 8.57E-08   | 2.16E-06   |
| 22°C     | 3.35E-07 | 8.33E-08   | 2.16E-06   |
| 25°C     | 4.89E-07 | 2.37E-07   | 2.31E-06   |
| 30°C     | 7.14E-07 | 4.62E-07   | 2.54E-06   |
| 32°C     | 6.92E-07 | 4.40E-07   | 2.52E-06   |
| 35°C     | 4.93E-07 | 2.24E-07   | 2.34E-06   |

**RNA (pg) per cell volume**

| Assay at | Estimate | conf lower | conf upper |
|----------|----------|------------|------------|
| 15°C     | 2.82E-04 | 1.93E-04   | 3.71E-04   |
| 20°C     | 3.45E-04 | 1.30E-04   | 5.60E-04   |
| 22°C     | 2.82E-04 | 6.72E-05   | 4.97E-04   |
| 25°C     | 2.88E-04 | 7.27E-05   | 5.03E-04   |
| 30°C     | 6.02E-04 | 3.87E-04   | 8.18E-04   |
| 32°C     | 7.49E-04 | 5.33E-04   | 9.64E-04   |
| 35°C     | 1.05E-03 | 8.19E-04   | 1.28E-03   |

**Silicate (pmol) per cell volume**

| Assay at | Estimate | conf lower | conf upper |
|----------|----------|------------|------------|
| 15°C     | 1.71E-04 | 7.71E-05   | 2.65E-04   |
| 20°C     | 3.12E-04 | 9.10E-05   | 5.36E-04   |
| 22°C     | 1.02E-04 | -1.19E-04  | 3.23E-04   |
| 25°C     | 1.90E-04 | -3.10E-05  | 4.11E-04   |
| 30°C     | 4.88E-05 | -1.72E-04  | 2.70E-04   |
| 32°C     | 2.37E-05 | -1.97E-04  | 2.45E-04   |
| 35°C     | 1.17E-05 | -2.20E-04  | 2.51E-04   |

**C:N**

| Assay at | Estimate | conf lower | conf upper |
|----------|----------|------------|------------|
| 15°C     | 6.42     | 5.80       | 7.03       |
| 20°C     | 7.61     | 6.21       | 9.06       |
| 22°C     | 6.80     | 5.40       | 8.21       |

|      |      |      |      |
|------|------|------|------|
| 25°C | 7.76 | 6.36 | 9.17 |
| 30°C | 7.33 | 5.93 | 8.74 |
| 32°C | 7.99 | 6.59 | 9.40 |
| 35°C | 7.78 | 6.36 | 9.36 |

**N:P**

| Assay at | Estimate | conf lower | conf upper |
|----------|----------|------------|------------|
| 15°C     | 10.87    | 8.66       | 13.09      |
| 20°C     | 8.11     | 7.76       | 11.13      |
| 22°C     | 8.37     | 7.02       | 12.73      |
| 25°C     | 9.37     | 7.66       | 14.73      |
| 30°C     | 15.27    | 9.91       | 16.72      |
| 32°C     | 14.69    | 9.33       | 18.04      |
| 35°C     | 15.86    | 10.13      | 20.02      |

**Chl:C**

| Assay at | Estimate | conf lower | conf upper |
|----------|----------|------------|------------|
| 15°C     | 5.77E-02 | 2.31E-02   | 9.23E-02   |
| 20°C     | 9.68E-02 | 1.39E-02   | 1.80E-01   |
| 22°C     | 2.05E-01 | 1.23E-01   | 2.88E-01   |
| 25°C     | 1.85E-01 | 1.02E-01   | 2.68E-01   |
| 30°C     | 1.11E-01 | 2.77E-02   | 1.93E-01   |
| 32°C     | 3.44E-02 | 1.00E-03   | 1.17E-01   |
| 35°C     | 1.22E-02 | 1.00E-04   | 1.00E-01   |

**ΦPSII**

| Assay at | Estimate | conf lower | conf upper |
|----------|----------|------------|------------|
| 15°C     | NA       | NA         | NA         |
| 20°C     | NA       | NA         | NA         |
| 22°C     | 0.38     | 0.32       | 0.4        |
| 25°C     | 0.39     | 0.32       | 0.42       |
| 30°C     | NA       | NA         | NA         |
| 32°C     | 0.093    | 0.085      | 0.1        |
| 35°C     | 0.088    | 0.024      | 0.099      |

**C:P**

| Assay at | Estimate | conf lower | conf upper |
|----------|----------|------------|------------|
| 15°C     | 61.88    | 50.72      | 74.65      |
| 20°C     | 56.78    | 34.09      | 89.67      |
| 22°C     | 72.44    | 68.98      | 84.57      |
| 25°C     | 110.44   | 84.71      | 98.20      |

|      |        |       |        |
|------|--------|-------|--------|
| 30°C | 117.72 | 84.99 | 136.01 |
| 32°C | 122.63 | 92.27 | 143.49 |
| 35°C | 62.68  | 97.69 | 111.84 |

**Table S11| Model selection for size, C, N, P, Si, RNA, and protein quota per cell volume as well as C:N, C:P, N:P, Chl:C ratio, and  $\Phi_{PSII}$  at irradiance as in the incubator for samples after 300 generations of selection.** All traits were analyzed using separate mixed effects models, where ‘selection regime’ was a fixed effect and replicate nested within selection regime was a random effect on the intercept. In all traits, there was a significant effect of selection regime. Models were compared via the small sample-size corrected Akaike Information Criterion (AICc), delta AICc is the difference in AICc score relative to the model with the lowest value (most parsimonious model) and Weight is the relative support for the model. The best fitting models were selected as those returning the lowest AICc score and the highest AICc weight and are highlighted in bold.

### Model selection

| <b>Cell volume (<math>\mu\text{m}^3</math>)</b>                                         |             |                  |          |                 |               |          |          |
|-----------------------------------------------------------------------------------------|-------------|------------------|----------|-----------------|---------------|----------|----------|
| Global Model: fixed = Size ~ selection regime, random = ~1   selection regime/replicate |             |                  |          |                 |               |          |          |
| Model                                                                                   | Intercept   | selection regime | Df       | logLik          | AICc          | delta    | weight   |
| <b>2</b>                                                                                | <b>3794</b> | <b>+</b>         | <b>7</b> | <b>-2032.12</b> | <b>4078.8</b> | <b>0</b> | <b>1</b> |
| 1                                                                                       | 5776        |                  | 3        | -2048.43        | 4103          | 24.17    | 0        |

  

| <b>Carbon (pmol) per cell volume</b>                                                           |                 |                  |          |               |                |             |          |
|------------------------------------------------------------------------------------------------|-----------------|------------------|----------|---------------|----------------|-------------|----------|
| Global Model: fixed = Ccellvolume ~ selection regime, random = ~1   selection regime/replicate |                 |                  |          |               |                |             |          |
| Model                                                                                          | Intercept       | selection regime | Df       | logLik        | AICc           | delta       | weight   |
| <b>2</b>                                                                                       | <b>2.83E-04</b> | <b>+</b>         | <b>7</b> | <b>208.70</b> | <b>-396.40</b> | <b>0.00</b> | <b>1</b> |
| 1                                                                                              | 2.27E-04        | 4                | 4        | 191.55        | -373.00        | 23.39       | 0        |

  

| <b>Nitrogen (pmol) per cell volume</b>                                                        |                 |                  |          |                |               |          |          |
|-----------------------------------------------------------------------------------------------|-----------------|------------------|----------|----------------|---------------|----------|----------|
| Global Model: fixed = Ncellvolume~ selection regime, random = ~1   selection regime/replicate |                 |                  |          |                |               |          |          |
| Model                                                                                         | Intercept       | selection regime | Df       | logLik         | AICc          | delta    | weight   |
| <b>2</b>                                                                                      | <b>4.37E-05</b> | <b>+</b>         | <b>7</b> | <b>250.285</b> | <b>-479.6</b> | <b>0</b> | <b>1</b> |
| 1                                                                                             | 3.71E-05        |                  | 4        | 235.83         | -461.6        | 18.02    | 0        |

  

| <b>Phosphorus (pmol) per cell volume</b>                                                       |                 |                  |          |               |               |          |          |
|------------------------------------------------------------------------------------------------|-----------------|------------------|----------|---------------|---------------|----------|----------|
| Global Model: fixed = Pcellvolume ~ selection regime, random = ~1   selection regime/replicate |                 |                  |          |               |               |          |          |
| Model                                                                                          | Intercept       | selection regime | Df       | logLik        | AICc          | delta    | weight   |
| <b>2</b>                                                                                       | <b>4.66E-06</b> | <b>+</b>         | <b>7</b> | <b>306.35</b> | <b>-591.7</b> | <b>0</b> | <b>1</b> |
| 1                                                                                              | 3.35E-06        | 4                | 4        | 289.702       | -569.3        | 22.4     | 0        |

---

---

**Protein (ng) content per cell volume**

---

Global Model: fixed = Protcellvolume ~ selection regime, random = ~1 | selection regime/replicate

| Model    | Intercept       | selection regime | Df       | logLik         | AICc          | delta    | weight       |
|----------|-----------------|------------------|----------|----------------|---------------|----------|--------------|
| <b>2</b> | <b>3.35E-07</b> | <b>+</b>         | <b>7</b> | <b>360.069</b> | <b>-699.1</b> | <b>0</b> | <b>0.842</b> |
| 1        | 3.57E-07        |                  | 4        | 352.946        | -695.8        | 3.35     | 0.158        |

---

---

---

**RNA (pg) content per cell volume**

---

Global Model: fixed = RNAcellvolume~ selection regime, random = ~1 | selection regime/replicate

| Model    | Intercept       | selection regime | Df       | logLik        | AICc          | delta    | weight       |
|----------|-----------------|------------------|----------|---------------|---------------|----------|--------------|
| <b>2</b> | <b>2.62E-04</b> | <b>+</b>         | <b>7</b> | <b>208.45</b> | <b>-395.9</b> | <b>0</b> | <b>0.998</b> |
| 1        | 1.76E-04        |                  | 4        | 196.834       | -383.6        | 12.34    | 0.002        |

---

---

---

**Silicate (pmol) per cell volume**

---

Global Model: fixed = Si ~ selection regime, random = ~1 | selection regime/replicate

| Model    | Intercept       | selection regime | Df       | logLik         | AICc          | delta    | weight      |
|----------|-----------------|------------------|----------|----------------|---------------|----------|-------------|
| <b>2</b> | <b>5.88E-05</b> | <b>+</b>         | <b>7</b> | <b>212.688</b> | <b>-411.1</b> | <b>0</b> | <b>0.51</b> |
| 1        | 3.90E-05        |                  | 4        | 216.045        | -415.3        | 4.18     | 0.49        |

---

---

---

**C:N**

---

Global Model: fixed = CN ~ selection regime, random = ~1 | selection regime/replicate

| Model    | Intercept   | selection regime | Df       | logLik        | AICc          | delta    | weight      |
|----------|-------------|------------------|----------|---------------|---------------|----------|-------------|
| <b>2</b> | <b>7.07</b> | <b>+</b>         | <b>7</b> | <b>-76.05</b> | <b>167.50</b> | <b>0</b> | <b>0.99</b> |
| 1        | 7.18        |                  | 3        | -88.973       | 183.60        | 16.07    | 0.01        |

---

---

---

**N:P**

---

Global Model: fixed = NP ~ selection regime, random = ~1 | selection regime/replicate

| Model    | Intercept    | selection regime | Df       | logLik         | AICc          | delta    | weight      |
|----------|--------------|------------------|----------|----------------|---------------|----------|-------------|
| <b>2</b> | <b>10.16</b> | <b>+</b>         | <b>7</b> | <b>-195.04</b> | <b>405.40</b> | <b>0</b> | <b>1.00</b> |
| 1        | 12.46        |                  | 3        | -209.91        | 426.1         | 20.66    | 0           |

---

---

---

**C:P**

---

Global Model: fixed = CP ~ selection regime, random = ~1 | selection regime/replicate

| Model    | Intercept    | selection regime | Df       | logLik         | AICc          | Delta       | weight      |
|----------|--------------|------------------|----------|----------------|---------------|-------------|-------------|
| <b>2</b> | <b>70.77</b> | <b>+</b>         | <b>7</b> | <b>-393.15</b> | <b>801.70</b> | <b>0.00</b> | <b>1.00</b> |
| 1        | 90.72        |                  | 3        | -406.84        | 820           | 18.27       | 0.00        |

---

---

---

**Chlorophyll:C ratio**

---

---

Global Model: fixed = Chl:C ~ selection regime, random = ~1 | selection regime/replicate

| Model    | Intercept   | selection regime | Df       | logLik        | AICc          | delta    | weight   |
|----------|-------------|------------------|----------|---------------|---------------|----------|----------|
| <b>2</b> | <b>0.02</b> | <b>+</b>         | <b>7</b> | <b>413.58</b> | <b>-812.6</b> | <b>0</b> | <b>1</b> |
| 1        | 0.08        |                  | 3        | 352.88        | -699.6        | 112.95   | 0        |

---

---

 **$\Phi_{PSII}$** 

---

---

Global Model: fixed =  $\Phi_{PSII}$  ~ selection regime, random = ~1 | selection regime/replicate

| Model    | Intercept   | selection regime | Df       | logLik        | AICc           | delta    | weight      |
|----------|-------------|------------------|----------|---------------|----------------|----------|-------------|
| <b>2</b> | <b>0.12</b> | <b>+</b>         | <b>6</b> | <b>137.86</b> | <b>-263.71</b> | <b>0</b> | <b>0.81</b> |
| 1        | 0.15        |                  | 3        | 124.28        | -242.56        | 21.15    | 0.19        |

---

---

**Parameter estimates and 95% confidence intervals**

---

**Cell volume ( $\mu\text{m}^3$ )**

---

| Selection regime | Parameter estimate | 95% Confidence interval [lower, upper] |
|------------------|--------------------|----------------------------------------|
| Ancestor         | 3794.25            | [3113.64, 4474.86]                     |
| 22°C             | 3610.65            | [2821.51, 4399.79]                     |
| 26°C             | 6359.75            | [5541.58, 7177.92]                     |
| 32°C             | 8588.82            | [7895.87, 9281.77]                     |
| FS               | 4643.54            | [3969.93, 5317.15]                     |

---

**C ( $\mu\text{mol}$ ) per cell volume**

---

| Selection regime | Parameter estimate | 95% Confidence interval [lower, upper] |
|------------------|--------------------|----------------------------------------|
| Ancestor         | 2.27E-04           | [1.22E-04, 3.32E-04]                   |
| 22°C             | 2.83E-04           | [2.39E-04, 3.26E-04]                   |
| 26°C             | 2.67E-04           | [1.62E-04, 3.72E-04]                   |
| 32°C             | 1.04E-04           | [-3.23E-07, 2.09E-04]                  |
| FS               | 2.52E-04           | [1.47E-04, 3.57E-04]                   |

---

**N ( $\mu\text{mol}$ ) per cell volume**

---

| Selection regime | Parameter estimate | 95% Confidence interval [lower, upper] |
|------------------|--------------------|----------------------------------------|
| Ancestor         | -9.99E-06          | [1.59E-05, 5.15E-05]                   |
| 22°C             | 4.37E-05           | [3.63E-05, 5.11E-05]                   |
| 26°C             | 8.65E-07           | [2.67E-05, 6.24E-05]                   |
| 32°C             | -2.54E-05          | [4.81E-07, 3.61E-05]                   |

---



| FS                                     | -1.82E-06                 | [2.41E-05, 5.97E-05]                          |
|----------------------------------------|---------------------------|-----------------------------------------------|
| <b>P (pmol) per cell volume</b>        |                           |                                               |
| <b>Selection regime</b>                | <b>Parameter estimate</b> | <b>95% Confidence interval [lower, upper]</b> |
| Ancestor                               | -6.35E-07                 | [2.54E-06, 5.50E-06]                          |
| 22°C                                   | 4.66E-06                  | [4.03E-06, 5.29E-06]                          |
| 26°C                                   | -1.05E-06                 | [2.13E-06, 5.09E-06]                          |
| 32°C                                   | -3.24E-06                 | [-5.98E-08, 2.90E-06]                         |
| FS                                     | -9.63E-07                 | [2.22E-06, 5.18E-06]                          |
| <b>Protein (ng) per cell volume</b>    |                           |                                               |
| <b>Selection regime</b>                | <b>Parameter estimate</b> | <b>95% Confidence interval [lower, upper]</b> |
| Ancestor                               | 1.53E-10                  | [1.84E-07, 4.86E-07]                          |
| 22°C                                   | 3.35E-07                  | [2.69E-07, 4.01E-07]                          |
| 26°C                                   | -1.50E-08                 | [1.69E-07, 4.71E-07]                          |
| 32°C                                   | -3.06E-08                 | [1.53E-07, 4.55E-07]                          |
| FS                                     | 1.33E-07                  | [3.17E-07, 6.19E-07]                          |
| <b>RNA (pg) per cell volume</b>        |                           |                                               |
| <b>Selection regime</b>                | <b>Parameter estimate</b> | <b>95% Confidence interval [lower, upper]</b> |
| Ancestor                               | 2.08E-05                  | [1.93E-04, 3.72E-04]                          |
| 22°C                                   | 2.62E-04                  | [2.24E-04, 2.99E-04]                          |
| 26°C                                   | -1.15E-04                 | [5.73E-05, 2.37E-04]                          |
| 32°C                                   | -9.10E-05                 | [8.09E-05, 2.60E-04]                          |
| FS                                     | -1.38E-04                 | [3.40E-05, 2.13E-04]                          |
| <b>Silicate (pmol) per cell volume</b> |                           |                                               |
| <b>Selection regime</b>                | <b>Parameter estimate</b> | <b>95% Confidence interval [lower, upper]</b> |
| Ancestor                               | 4.33E-05                  | [3.96E-05, 1.65E-04]                          |
| 22°C                                   | 5.88E-05                  | [3.19E-05, 8.56E-05]                          |
| 26°C                                   | -3.45E-05                 | [-3.82E-05, 8.68E-05]                         |
| 32°C                                   | -3.81E-05                 | [-4.18E-05, 8.31E-05]                         |
| FS                                     | -6.57E-06                 | [-1.03E-05, 1.15E-04]                         |
| <b>C:N</b>                             |                           |                                               |
| <b>Selection regime</b>                | <b>Parameter estimate</b> | <b>95% Confidence interval [lower, upper]</b> |
| Ancestor                               | 7.07                      | [7.02, 7.12]                                  |
| 22°C                                   | 6.94                      | [6.82, 7.06]                                  |

|      |      |              |
|------|------|--------------|
| 26°C | 7.08 | [7.07, 7.09] |
| 32°C | 7.21 | [7.08, 7.34] |
| FS   | 7.18 | [7.09, 7.27] |

**N:P**

| <b>Selection regime</b> | <b>Parameter estimate</b> | <b>95% Confidence interval [lower, upper]</b> |
|-------------------------|---------------------------|-----------------------------------------------|
| Ancestor                | 10.16                     | [9.93, 10.39]                                 |
| 22°C                    | 10.14                     | [9.85, 10.43]                                 |
| 26°C                    | 12.75                     | [12.44, 13.06]                                |
| 32°C                    | 15.07                     | [14.81, 15.33]                                |
| FS                      | 13.21                     | [12.76, 13.66]                                |

**C:P**

| <b>Selection regime</b> | <b>Parameter estimate</b> | <b>95% Confidence interval [lower, upper]</b> |
|-------------------------|---------------------------|-----------------------------------------------|
| Ancestor                | 70.78                     | [67.91, 73.65]                                |
| 22°C                    | 69.91                     | [67.16, 72.66]                                |
| 26°C                    | 84.91                     | [82.25, 87.57]                                |
| 32°C                    | 112.93                    | [109.22, 116.64]                              |
| FS                      | 93.22                     | [84.32, 102.12]                               |
| FS                      | 0.202                     | [0.186, 0.218]                                |

**Chlorophyll:C ratio**

| <b>Selection regime</b> | <b>Parameter estimate</b> | <b>95% Confidence interval [lower, upper]</b> |
|-------------------------|---------------------------|-----------------------------------------------|
| Ancestor                | 0.024                     | [0.017, 0.031]                                |
| 22°C                    | 0.071                     | [0.069, 0.073]                                |
| 26°C                    | 0.121                     | [0.119, 0.123]                                |
| 32°C                    | 0.088                     | [0.082, 0.094]                                |
| FS                      | 0.085                     | [0.078, 0.092]                                |

**$\Phi_{PSII}$  at Iopt**

| <b>Selection regime</b> | <b>Parameter estimate</b> | <b>95% Confidence interval [lower, upper]</b> |
|-------------------------|---------------------------|-----------------------------------------------|
| Ancestor                | 0.12                      | [0.119, 0.121]                                |
| 22°C                    | 0.09                      | [0.082, 0.098]                                |
| 26°C                    | 0.12                      | [0.112, 0.128]                                |
| 32°C                    | 0.08                      | [0.073, 0.087]                                |
| FS                      | 0.12                      | [0.119, 0.121]                                |

**Table S12| PERMANOVA and pairwise comparisons based on treatment-level divergence in phenotypic traits.** Phenotypic trait values of a population in its selection environment after 300 generations of evolution were normalised relative to the trait values of the ancestor in that same environment. The traits investigated were gross photosynthesis at saturating light intensity and incubator light intensity, growth and respiration rates, intracellular stoichiometry (ratios and amounts per cell), cell size, chlorophyll content, FRRF data (dark adapted  $F_v/F_m$  at incubator and saturating light intensity, and as a function of light intensity for photosynthetic efficiency, relative rate of electron transport through PSII,  $C$  as the proportion of PSII reaction centres in a closed state, and NPQ as non-photochemical quenching), and flow cytometry data (side scatter for granularity, FL1 fluorescence after a rhodamine dye as a proxy for  $H^+$  transport across mitochondrial membranes, FL2 and FL3 fluorescence after a Nile Red dye as a proxy for intracellular lipid content). The phenotypic trait data were then analysed through calculating a difference matrix and using permutational multivariate analysis of variance (PERMANOVA) to assess overall treatment effects and individual pairwise differences between levels of the treatment were assessed with TukeyHSD tests.

| ANOVA Table        | Phenotype  |              |              |         |           |
|--------------------|------------|--------------|--------------|---------|-----------|
| Response:          | Distances  |              |              |         |           |
|                    | Df         | Sum Sq       | Mean Sq      | F value | Pr(>F)    |
| Treatment          | 4          | 3.3427       | 0.83568      | 3.3174  | 0.03075 * |
| Residuals          | 20         | 5.0382       | 0.25191      |         |           |
| ---                |            |              |              |         |           |
| Pairwise distances |            |              |              |         |           |
| Comparison         | Difference | Lower 95% CI | Upper 95% CI | P       |           |
| 26-22              | 0.69       | 0.17         | 1.56         | 0.051   |           |
| 32-22              | 0.38       | 0.19         | 1.25         | 0.049   |           |
| Anc-22             | -1.04      | -2.66        | -0.28        | 0.034   |           |
| FS-22              | 0.39       | 0.18         | 1.25         | 0.047   |           |
| 32-26              | -0.31      | -1.18        | -0.15        | 0.048   |           |
| Anc-26             | -1.73      | -3.35        | -0.11        | 0.033   |           |
| FS-26              | -0.31      | -1.17        | 0.56         | 0.827   |           |
| Anc-32             | -1.42      | -3.04        | -0.20        | 0.010   |           |
| FS-32              | 0.01       | -0.86        | 0.88         | 0.100   |           |
| FS-Anc             | 1.43       | 0.82         | 3.05         | 0.020   |           |

**Table S13| Table of candidate genes in the populations from the fluctuating environment where variants reoccurred in independent replicate cultures subjected to elevated temperature but not those grown at moderate temperature.** Listed below are candidate genes, the populations they occurred in, and putative function as retrieved through GO terms for biological processes where known. Note that this list is too small to carry out enrichment tests with confidence.

| <b>Gene</b>      | <b>Population</b> | <b>Putative function</b>                                                   |
|------------------|-------------------|----------------------------------------------------------------------------|
| THAPSDRAFT_20620 | FS b1 and FS b5   | hypothetical protein, involved in transcription                            |
| THAPSDRAFT_23072 | FS b1 and FS b5   | hypothetical protein, protein coding                                       |
| THAPSDRAFT_2335  | FS b1 and FS b5   | hypothetical protein, involved in transcription                            |
| THAPSDRAFT_24141 | FS b1 and FS b5   | hypothetical protein, involved in transcription                            |
| THAPSDRAFT_1762  | FS b3 and FS b5   | hypothetical protein, membrane traffic                                     |
| THAPSDRAFT_21967 | FS b1 and FS b3   | hypothetical protein, zinc finger involved in transcription                |
| THAPSDRAFT_2720  | FS b1 and FS b3   | hypothetical protein, protein coding, especially heat stress transcription |

**Table S14| Aligned sequence depths for each sequenced population.** After trimming and filtering, remaining sequence reads were then aligned against version 2 of the reference *T. pseudonana* genome sequence (GenBank: GCA\_000149405.2) using BWA-mem version 0.7.5a-2 with default settings . This resulted in average aligned sequence depths of 18.5 X. and a set of 64 BAM-formatted files. Depths and insert lengths were calculated using Qualimap.

| <b>Population name</b> | <b>Mean aligned sequence depth (X)</b> | <b>Accession number</b>                                               | <b>Mapping quality mean</b> | <b>Median insert length (b.p.)</b> |
|------------------------|----------------------------------------|-----------------------------------------------------------------------|-----------------------------|------------------------------------|
| t0_S45                 | 18.46                                  | All data can be found at<br>SRA: SRP114919<br>BioProject: PRJNA397360 | 57.47                       | 317.0                              |
| t300_22_b1_S19         | 18.39                                  |                                                                       | 57.54                       | 281.0                              |
| t300_22_b2_S20         | 18.61                                  |                                                                       | 57.48                       | 339.0                              |
| t300_22_b3_S21         | 17.66                                  |                                                                       | 57.6                        | 259.0                              |
| t300_22_b4_S22         | 17.57                                  |                                                                       | 57.61                       | 229.0                              |
| t300_22_b5_S23         | 18.52                                  |                                                                       | 57.45                       | 333.0                              |
| t300_22_b6_S24         | 18.29                                  |                                                                       | 57.58                       | 274.0                              |
| t300_26_b1_S25         | 18.65                                  |                                                                       | 52.83                       | 345.0                              |
| t300_26_b2_S26         | 6.67                                   |                                                                       | 57.63                       | 170.0                              |
| t300_26_b3_S27         | 15.02                                  |                                                                       | 57.72                       | 109.0                              |
| t300_26_b4_S28         | 15.25                                  |                                                                       | 57.59                       | 120.0                              |
| t300_26_b5_S29         | 18.71                                  |                                                                       | 57.48                       | 353.0                              |
| t300_26_b6_S14         | 18.61                                  |                                                                       | 57.38                       | 439.0                              |
| t300_32_b1_S3          | 18.65                                  |                                                                       | 57.53                       | 431.0                              |
| t300_32_b2_S4          | 18.75                                  |                                                                       | 57.35                       | 502.0                              |
| t300_32_b3_S5          | 18.68                                  |                                                                       | 57.45                       | 489.0                              |
| t300_32_b4_S10         | 18.58                                  |                                                                       | 57.38                       | 441.0                              |
| t300_32_b5_S9          | 18.41                                  |                                                                       | 57.4                        | 391.0                              |
| t300_32_b6_S8          | 18.28                                  |                                                                       | 57.35                       | 348.0                              |
| t300_FS_b1_S31         | 8.71                                   |                                                                       | 57.51                       | 276.0                              |
| t300_FS_b2_S7          | 18.62                                  |                                                                       | 57.39                       | 426.0                              |
| t300_FS_b3_S33         | 7.11                                   |                                                                       | 57.42                       | 307.0                              |
| t300_FS_b4_S6          | 18.74                                  |                                                                       | 57.36                       | 509.0                              |
| t300_FS_b5_S35         | 15.83                                  |                                                                       | 57.45                       | 319.0                              |
| t300_FS_b6_S36         | 18.62                                  |                                                                       | 57.5                        | 290.0                              |

**Table S15| Model selection for the light response curves of photochemical efficiency.**

An exponential decay function (see Eq. (8)) was fitted to the photochemical efficiency ( $\phi_{PSII}$ ) light response curves using a non-linear mixed effects model. “Selection regime” was fitted as a fixed factor to test for differences in the parameters characterizing the light response curves for between the ancestor and the selection regimes. Models were compared via the small sample-size corrected Akaike Information Criterion (AICc), delta AICc is the difference in AICc score relative to the model with the lowest value (most parsimonious model) and Weight is the relative support for the model. The best fitting models were selected as those returning the lowest AICc score and the highest AICc weight and are highlighted in bold.

**Model selection for  $\phi_{PSII}$  ancestor populations**

| Model       | Df       | Assay temperature effect dropped on | AICc            | Log Lik       | Delta    | Weight      |
|-------------|----------|-------------------------------------|-----------------|---------------|----------|-------------|
| <b>Full</b> | <b>9</b> |                                     | <b>-1087.66</b> | <b>552.83</b> | <b>0</b> | <b>0.74</b> |
| Exp.mix2    | 7        | Slope b                             | -956.38         | 485.19        | 131.28   | 0.24        |
| Exp.mix1    | 7        | Intercept a                         | -695.53         | 354.76        | 392.21   | 0.02        |

**Model selection for  $\phi_{PSII}$  evolved populations**

| Model       | Df        | Selection regime effect dropped on | AICc            | LogLik          | Delta    | Weight      |
|-------------|-----------|------------------------------------|-----------------|-----------------|----------|-------------|
| <b>Full</b> | <b>11</b> |                                    | <b>-1554.52</b> | <b>-1512.54</b> | <b>0</b> | <b>0.84</b> |
| Exp.mix1    | 8         | Intercept a                        | -1540.76        | -1510.21        | 13.76    | 0.09        |
| Exp.mix2    | 8         | Slope b                            | -1540.39        | -1509.85        | 14.13    | 0.07        |

**Parameter estimates and 95% confidence intervals**

| Selection regime and parameter | Estimate | 95% confidence interval [lower, upper] |
|--------------------------------|----------|----------------------------------------|
| Slope Ancestor (at 22°C)       | - 0.0013 | [-0.0014, -0.0012]                     |
| Intercept Ancestor (at 22°)    | 0.51     | [0.49, 0.53]                           |
| Slope Ancestor (at 26°C)       | - 0.0009 | [-0.001, -0.0008]                      |
| Intercept Ancestor (at 26°C)   | 0.31     | [0.29, 0.32]                           |
| Slope Ancestor (at 32°C)       | - 0.0029 | [-0.005, -0.0009]                      |
| Intercept Ancestor (at 32°C)   | 0.21     | [0.19, 0.23]                           |

---

---

|                           |         |                    |
|---------------------------|---------|--------------------|
| Slope evolved 22°C        | -0.0012 | [-0.0014, -0.0010] |
| Intercept evolved<br>22°C | 0.36    | [0.32, 0.40]       |
| Slope evolved 26°C        | -0.0009 | [-0.0011, -0.0007] |
| Intercept evolved<br>26°C | 0.41    | [0.39, 0.43]       |
| Slope evolved 32°C        | -0.0005 | [-0.0006, -0.0004] |
| Intercept evolved<br>32°C | 0.56    | [0.54, 0.58]       |
| Slope evolved FS          | -0.0008 | [-0.0007, -0.0009] |
| Intercept evolved FS      | 0.46    | [0.44, 0.48]       |

---

---

**Table S16s| PERMANOVA and pairwise comparison for differences between treatments (Bacteria)**

To estimate the relative abundances of taxa represented in the data, we used BLASTN (version 2.5.0+) to align 10 000 sequence reads from each sample against the NCBI's non-redundant Nucleotide database and assigned matches to species using MEGAN (version 5.11.3). A distance matrix was then calculated from Bray-Curtis distances and passed to permutational multivariate analysis of variance (PERMANOVA) to assess overall treatment effects and individual pairwise differences between levels of the treatment were assessed with TukeyHSD tests.

| ANOVA Table |           | SNPs   |         |         |        |
|-------------|-----------|--------|---------|---------|--------|
| Response:   | Distances |        |         |         |        |
|             | Df        | Sum Sq | Mean Sq | F value | Pr(>F) |
| Treatment   | 4         | 0.0097 | 0.002   | 0.62    | 0.11   |
| Residuals   | 20        | 0.079  | 0.004   |         |        |

  

| Pairwise distances |            |              |              |       |
|--------------------|------------|--------------|--------------|-------|
| Comparison         | Difference | Lower 95% CI | Upper 95% CI | P     |
| 26-22              | -0.028     | -0.137       | 0.080        | 0.930 |
| 32-22              | -0.022     | -0.131       | 0.086        | 0.970 |
| Anc-22             | -0.181     | -0.268       | 0.037        | 0.048 |
| FS-22              | 0.013      | -0.095       | 0.121        | 0.996 |
| 32-26              | 0.006      | -0.102       | 0.114        | 1.000 |
| Anc-26             | -0.068     | -0.239       | 0.006        | 0.038 |
| FS-26              | 0.0415     | -0.067       | 0.150        | 0.780 |
| Anc-32             | -0.098     | -0.245       | 0.060        | 0.038 |
| FS-32              | 0.036      | -0.073       | 0.144        | 0.862 |
| FS-Anc             | -0.199     | -0.124       | 0.002        | 0.046 |
